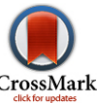

# Computerized Cognitive Training in Cognitively Healthy Older Adults: A Systematic Review and Meta-Analysis of Effect Modifiers

Amit Lampit, Harry Hallock, Michael Valenzuela\*

Regenerative Neuroscience Group, Brain and Mind Research Institute, University of Sydney, Sydney, New South Wales, Australia

## Abstract

**Background:** New effective interventions to attenuate age-related cognitive decline are a global priority. Computerized cognitive training (CCT) is believed to be safe and can be inexpensive, but neither its efficacy in enhancing cognitive performance in healthy older adults nor the impact of design factors on such efficacy has been systematically analyzed. Our aim therefore was to quantitatively assess whether CCT programs can enhance cognition in healthy older adults, discriminate responsive from nonresponsive cognitive domains, and identify the most salient design factors.

**Methods and Findings:** We systematically searched Medline, Embase, and PsycINFO for relevant studies from the databases' inception to 9 July 2014. Eligible studies were randomized controlled trials investigating the effects of  $\geq 4$  h of CCT on performance in neuropsychological tests in older adults without dementia or other cognitive impairment. Fifty-two studies encompassing 4,885 participants were eligible. Intervention designs varied considerably, but after removal of one outlier, heterogeneity across studies was small ( $I^2 = 29.92\%$ ). There was no systematic evidence of publication bias. The overall effect size (Hedges'  $g$ , random effects model) for CCT versus control was small and statistically significant,  $g = 0.22$  (95% CI 0.15 to 0.29). Small to moderate effect sizes were found for nonverbal memory,  $g = 0.24$  (95% CI 0.09 to 0.38); verbal memory,  $g = 0.08$  (95% CI 0.01 to 0.15); working memory (WM),  $g = 0.22$  (95% CI 0.09 to 0.35); processing speed,  $g = 0.31$  (95% CI 0.11 to 0.50); and visuospatial skills,  $g = 0.30$  (95% CI 0.07 to 0.54). No significant effects were found for executive functions and attention. Moderator analyses revealed that home-based administration was ineffective compared to group-based training, and that more than three training sessions per week was ineffective versus three or fewer. There was no evidence for the effectiveness of WM training, and only weak evidence for sessions less than 30 min. These results are limited to healthy older adults, and do not address the durability of training effects.

**Conclusions:** CCT is modestly effective at improving cognitive performance in healthy older adults, but efficacy varies across cognitive domains and is largely determined by design choices. Unsupervised at-home training and training more than three times per week are specifically ineffective. Further research is required to enhance efficacy of the intervention.

Please see later in the article for the Editors' Summary.

**Citation:** Lampit A, Hallock H, Valenzuela M (2014) Computerized Cognitive Training in Cognitively Healthy Older Adults: A Systematic Review and Meta-Analysis of Effect Modifiers. PLoS Med 11(11): e1001756. doi:10.1371/journal.pmed.1001756

**Academic Editor:** Sam Gandy, Mount Sinai School of Medicine, United States of America

**Received:** March 13, 2014; **Accepted:** September 29, 2014; **Published:** November 18, 2014

**Copyright:** © 2014 Lampit et al. This is an open-access article distributed under the terms of the Creative Commons Attribution License, which permits unrestricted use, distribution, and reproduction in any medium, provided the original author and source are credited.

**Data Availability:** The authors confirm that all data underlying the findings are fully available without restriction. All relevant data are within the paper and its Supporting Information files.

**Funding:** AL is supported by the Dreikurs Bequest. MV is a National Health and Medical Research Council of Australia (<http://www.nhmrc.gov.au/>) research fellow (ID 1004156). The funders had no role in study design, data collection and analysis, decision to publish, or preparation of the manuscript.

**Competing Interests:** MV has received research funding and honoraria from the Brain Department LLC for a project unrelated to this work. His group also receives in-kind research support in the form of no-cost software from BrainTrain Inc (USA), also unrelated to this work.

**Abbreviations:** CCT, computerized cognitive training; CMA, Comprehensive Meta-Analysis; MCI, mild cognitive impairment; PEDro, Physiotherapy Evidence Database; RCT, randomized controlled trial; SD, standard deviation; SMD, standardized mean difference; SOP, speed of processing; WM, working memory.

\* Email: michael.valenzuela@sydney.edu.au

## Introduction

Cognitive decline and impairment are amongst the most feared and costly aspects of aging [1]. The age-specific incidence of cognitive impairment is approximately double that of dementia [2,3] and can be expected to affect 15%–25% of older individuals [2,4]. Direct medical costs for older adults with mild cognitive impairment (MCI) are 44% higher than those for non-impaired older adults [5]. Because cognitive decline and impairment are essential criteria for dementia and often require informal care [5], interventions aimed at prevention or attenuation of such decline may have a substantial health and economic impact [3].

Several studies have now established strong and independent links between engagement in cognitively stimulating activities throughout the life span and enhanced late-life cognition, compression of cognitive burden, and reduced risk of cognitive impairment and dementia [6–8]. Intense interest has therefore focused on the potential of cognition-based interventions in older adults, especially computerized cognitive training (CCT) [9]. CCT involves structured practice on standardized and cognitively challenging tasks [10], and has several advantages over traditional drill and practice methods, including visually appealing interfaces, efficient and scalable delivery, and the ability to constantly adapt training content and difficulty to individual performance [9,11]. Sales of commercial CCT packages may soon reach US\$1 billion per year [12], but the evidence base for such products, at least in older adults, remains unclear [13].

Prior systematic reviews of generic cognitive interventions in healthy older adults [9,14–18] have noted limitations, especially lack of supporting evidence from active-control trials and lack of replication due to inconsistent or indeterminate methodology. Importantly, these reviews pooled data from studies of CCT along with studies of other cognition-based interventions such as mnemonics or cognitive stimulation that can be as simple as reading newspapers or participating in group discussion [15–18]. It is therefore perhaps unsurprising that these reviews reached inconclusive results. A more recent systematic review in healthy older adults [9] was not restricted to randomized controlled trials (RCTs) and included CCT studies along with other computerized interventions such as classes in basic computer use.

The effectiveness of CCT in enhancing cognitive performance in healthy older adults is therefore currently unclear, and the impact of design and implementation factors on efficacy has yet to be systematically analyzed. Using data from RCTs of narrowly defined CCT, we aimed to quantitatively evaluate the efficacy of CCT with respect to multiple cognitive outcomes in healthy older adults. Furthermore, we aimed to test the moderating effect of several key study features in order to better inform future CCT trial design and clinical implementation.

## Methods

This work fully complies with the Preferred Reporting Items for Systematic Reviews and Meta-Analyses (PRISMA) guidelines [19] (see Checklist S1). Methods of analysis and inclusion criteria were specified in advance and are documented in Protocol S1.

### Eligibility Criteria

**Types of studies.** Eligible studies were published, peer-reviewed articles reporting results from RCTs of the effects of CCT on one or more cognitive outcomes in healthy older adults.

**Types of participants.** Eligible studies had mean participant age  $\geq 60$  y and participants who lacked any major cognitive,

neurological, psychiatric, and/or sensory impairments. Studies with MCI as an inclusion criterion were excluded, as cognitive performance in this population may vary substantially, particularly with respect to variability in the diagnostic criteria of MCI [20].

**Types of interventions.** Eligible trials compared the effects of  $\geq 4$  h of practice on standardized computerized tasks or video games with clear cognitive rationale, administered on personal computers, mobile devices, or gaming consoles, versus an active or passive control condition. Lab-specific interventions that did not involve interaction with a computer were excluded.

**Types of outcome measures.** Outcomes included performance on one or more cognitive tests that were not included in the training program (i.e., untrained), administered both before and after training. This review is limited to change in performance from baseline to immediately post-training on tests of global cognition, verbal memory, nonverbal memory, working memory (WM), processing speed, attention, language, visuospatial skills, and executive functions. Both primary and secondary outcomes were included. Long-term outcomes, subjective measures (e.g., questionnaires), noncognitive outcomes (e.g., mood, physical), imaging data, and activities of daily living outcome measures were excluded from the analysis.

### Information Sources and Search Strategy

We searched Medline, Embase, and PsycINFO using the search terms “cognitive training” OR “brain training” OR “memory training” OR “attention training” OR “reasoning training” OR “computerized training” OR “computer training” OR “video game” OR “computer game”, and by scanning reference lists of previous reviews. No limits were applied for publication dates, and non-English papers were translated. The first search was conducted on 2 December 2013. An updated search was conducted on 9 July 2014.

### Study Selection

Two reviewers (A. L. and H. H.) independently screened search results for initial eligibility based on title and abstract. Full-text versions of potentially eligible studies and those whose eligibility was unclear based on title and abstract were assessed by A. L. and H. H., who also contacted authors when eligibility was unclear based on the full report. Disagreements regarding study eligibility were resolved by consulting with M. V., who approved the final list of included studies.

### Data Collection and Coding

Coding of outcome measures into cognitive domains was done by two reviewers (A. L. and H. H.) based on accepted neuropsychological categorization [21] or by consensus, and approved by M. V. Table S1 provides the coding of outcomes by cognitive domains. Data were entered into Comprehensive Meta-Analysis (CMA) version 2 (Biostat, Englewood, New Jersey). Data from most studies were entered as means and standard deviations (SDs) for the CCT and control groups at baseline and follow-up, with test–retest correlation set to 0.6. In a few instances, data were entered as post-training mean change [22–24] or raw mean difference with a 95% confidence interval [25]. CMA allows for each of these different study outcomes to be flexibly entered into the model. When data could not be extracted from study reports, we contacted the authors requesting raw summary data.

CCT programs were divided into five content types: speed of processing (SOP) training, WM training, attention training, multidomain training, and video games. Video games were

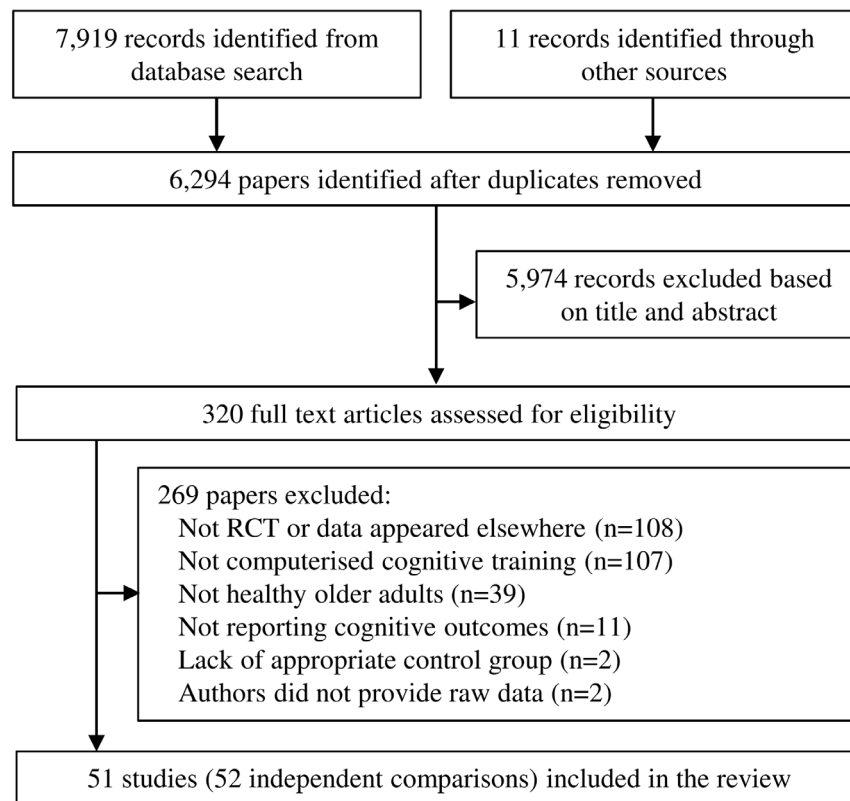

**Figure 1. Summary of trial identification and selection.** Note that a single study could be excluded on more than one criterion, but appears only once in the chart.

doi:10.1371/journal.pmed.1001756.g001

defined as computer programs that were distributed for entertainment purposes before they were tried as cognitive interventions [26].

When studies presented data for both active and passive control groups, only the active control group was used as a comparison to the CCT group. When studies presented data from both young and older adults, only data from the older group were analyzed.

### Risk of Bias in Individual Studies and Study Appraisal

Risk of bias in individual studies was assessed using the items recommended in the Cochrane's Collaboration's risk of bias tool [27]: sequence generation; allocation concealment; blinding of participants, personnel, and outcome assessors; incomplete outcome data; selective outcome reporting; and other sources of bias. However, because the blinding of therapists and participants in CCT trials is impractical, we considered only blinding of assessors to determine risk of bias in the blinding item. We considered trials with high or unclear risk of bias those that did not include assessor blinding or did not perform intention-to-treat analyses. We considered all other trials as being at low risk of bias. Authors were contacted when the study details were unclear.

In addition, we used the Physiotherapy Evidence Database (PEDro) scale to assess study quality. The PEDro scale is a 11-item scale designed to assess the methodological quality and reporting of RCTs, and is reliable for rating trials of non-pharmacological interventions [28]. As with the risk of bias tool, we did not consider two items in the PEDro scale (blinding of therapists and participants), and therefore the maximum possible PEDro score for studies in this review was 9. All assessments were conducted by

H. H. and additional external assessors (see Acknowledgments), and were subsequently reviewed by A. L.

### Data Analysis

The primary outcome was standardized mean difference (SMD, calculated as Hedges'  $g$ ) of post-training change between CCT and control groups. Analyses were conducted for all cognitive results combined, as well as for each of the following cognitive domains: verbal memory, nonverbal memory, WM, processing speed, attention, visuospatial skills, and executive functions (planned analyses of global cognition and language were not performed because of insufficient numbers of studies reporting these outcomes). Precision of the SMD was calculated for each trial by the 95% CI. A positive SMD implies better therapeutic effects over time in the CCT group compared to the control group.

When studies presented data from more than one cognitive test, these were combined in two ways. First, all test results were combined to produce a single SMD per study, following established procedure [29]. Second, tests were classified on their main neuropsychological competency (see Table S1), such that each study could contribute to one or more cognitive-domain-specific SMDs. When outcomes from a given study were combined, the effect estimate was the mean amongst the related tests, and the estimate's variance was scaled up based on an assumed intercorrelation between the tests of 0.7 [30,31]. All analyses were performed using CMA.

Because we expected studies to report multiple cognitive outcomes and display methodological variability [9,13], our analyses were planned in three stages. First, in our main analysis we combined all outcomes from each study and pooled these to

**Table 1.** Study characteristics.

| Study                      | Study Demographics |                   |                 | Intervention Design |             |          |                                      | Study Design and Quality |                       |                     |                          |         |                           |             |
|----------------------------|--------------------|-------------------|-----------------|---------------------|-------------|----------|--------------------------------------|--------------------------|-----------------------|---------------------|--------------------------|---------|---------------------------|-------------|
|                            | N                  | Mean Age          | Percent Female  | MMSE Score          | CCT Type    | Delivery | Program                              | Dose <sup>a</sup>        | Sessions <sup>b</sup> | Length <sup>c</sup> | Sessions/wk <sup>d</sup> | Control | Risk of Bias <sup>e</sup> | PEDro Score |
| Ackerman 2010 [64]         | 78                 | 60.7              | 46.2            |                     | Multidomain | Home     | Wii Big Brain Academy                | 20                       | 20                    | 60                  | 5                        | Active  | Low                       | 4           |
| Anderson 2013 [65]         | 67                 | 63.0              | 58.2            | 27.4 <sup>f</sup>   | Multidomain | Home     | PS Brain Fitness                     | 40                       | 40                    | 60                  | 5                        | Active  | High                      | 6           |
| Anguera 2013 [22]          | 31                 | 65.8              | 64.5            | ≥26                 | Attention   | Home     | In-house program                     | 12                       | 12                    | 60                  | 3                        | Passive | High                      | 5           |
| Ball 2002 [54]             | 1,398              | 73.6 <sup>g</sup> | 76 <sup>g</sup> | 27.3 <sup>g</sup>   | SOP         | Group    | SOP                                  | 11                       | 10                    | 67                  | 2                        | Passive | Low                       | 9           |
| Barnes 2013 [42]           | 63                 | 74.3              | 60.3            | 28.4 <sup>h</sup>   | Multidomain | Home     | PS Brain Fitness+InSight             | 36                       | 36                    | 60                  | 3                        | Active  | Low                       | 8           |
| Basak 2008 [66]            | 34                 | 69.6              | 74.4            | 29.3                | Video game  | Group    | Rise of Nations                      | 23.5                     | 15                    | 90                  | 3                        | Passive | High                      | 5           |
| Belchior 2013 [53] study 1 | 27                 | 74.3              | 40.7            | 29.1                | Video game  | Group    | Medal of Honor                       | 9                        | 6                     | 90                  | 2–3                      | Passive | High                      | 7           |
| Belchior 2013 [53] study 2 | 31                 | 74.7              | 61.3            | 29.3                | SOP         | Group    | SOP                                  | 9                        | 6                     | 90                  | 2–3                      | Active  | High                      | 7           |
| Berry 2010 [55]            | 30                 | 71.9              | 56.2            | 29.3                | SOP         | Mixed    | PS Sweep Seeker                      | 10                       | 15                    | 40                  | 3–5                      | Passive | Low                       | 6           |
| Boot 2013 [67]             | 40                 | 72.5              | 61              | 29                  | Multidomain | Home     | Brain Age 2 (Nintendo DS)            | 60                       | 60                    | 60                  | 5                        | Passive | High                      | 7           |
| Bottiroli 2009 [56]        | 44                 | 66.2              |                 | 27.6                | Multidomain | Group    | Neuropsychological training software | 6                        | 3                     | 120                 | 1                        | Passive | Low                       | 7           |
| Bozoki 2013 [68]           | 60                 | 68.9              | 58.4            | 27.3 <sup>i</sup>   | Multidomain | Home     | In-house program                     | 30                       | 30                    | 60                  | 5                        | Active  | High                      | 5           |
| Brehmer 2012 [77]          | 45                 | 63.8              | 60              |                     | WM          | Home     | Cogmed                               | 9                        | 23                    | 26                  | 4                        | Active  | High                      | 8           |
| Burki 2014 [78]            | 45                 | 68.1              | 76              |                     | WM          | Group    | In-house program                     | 5                        | 10                    | 30                  | 4                        | Passive | High                      | 6           |
| Buschkuhl 2008 [79]        | 39                 | 80.0              | 59              |                     | Multidomain | Group    | In-house program                     | 18                       | 24                    | 45                  | 2                        | Active  | High                      | 5           |
| Casutt 2014 [80]           | 46                 | 72.8              | 28.3            | 28.8                | Attention   | Group    | In-house program                     | 7                        | 10                    | 40                  | 2                        | Passive | High                      | 5           |
| Colzato 2011 [43]          | 60                 | 67.6              | 46.7            | 28.8                | Multidomain | Home     | In-house program                     | 25                       | 50                    | 30                  | 7                        | Active  | High                      | 5           |
| Dahlin 2008 [44]           | 29                 | 68.3              | 62.1            | 28.8                | WM          | Group    | In-house program                     | 11                       | 15                    | 45                  | 3                        | Passive | High                      | 5           |
| Dustman 1992 [45]          | 40                 | 66.3              | 60              |                     | Video game  | Group    | Various games                        | 33                       | 33                    | 60                  | 3                        | Active  | High                      | 6           |
| Edwards 2002 [69]          | 97                 | 73.7              | 56.7            |                     | SOP         | Group    | SOP                                  | 10                       | 10                    | 60                  | 2                        | Passive | High                      | 5           |
| Edwards 2005 [47]          | 126                | 75.6              |                 | 28.1                | SOP         | Group    | SOP                                  | 10                       | 10                    | 60                  | 2                        | Active  | Low                       | 7           |
| Edwards 2013 [70]          | 60                 | 73.1              | 69              | 28.1                | Multidomain | Group    | PS InSight                           | 15                       | 15                    | 60                  | 2–3                      | Passive | High                      | 5           |
| Garcia-Campuzano 2013 [57] | 24                 | 76.7              | 79.2            |                     | WM          | Group    | In-house program                     | 12                       | 24                    | 30                  | 3                        | Passive | Low                       | 7           |
| Goldstein 1997 [48]        | 22                 | 77.7              |                 |                     | Video game  | Home     | Tetris                               | 26–37                    |                       |                     |                          | Passive | High                      | 5           |
| Heinzel 2014 [81]          | 30                 | 65.8              | 70              | 29.5                | WM          | Group    | n-Back                               | 9                        | 12                    | 45                  | 3                        | Passive | High                      | 6           |
| Lampit 2014 [49]           | 77                 | 72.1              | 68.8            | 28                  | Multidomain | Group    | COGPACK                              | 36                       | 36                    | 60                  | 3                        | Active  | Low                       | 7           |
| Lee 2012 [50]              | 30                 | 73.8              | 53.3            | 27.0                | SOP         | Group    | RehaCom                              | 9                        | 18                    | 30                  | 3                        | Active  | High                      | 4           |
| Legault 2011 [71]          | 36                 | 75.7              | 41.5            | 28.5 <sup>h</sup>   | WM          | Group    | In-house program                     | 18                       | 24                    | 44                  | 2                        | Active  | High                      | 7           |
| Li 2010 [58]               | 20                 | 76.2              | 65              | 26.9 <sup>f</sup>   | Attention   | Group    | Dual-task training                   | 5                        | 5                     | 60                  | 2                        | Passive | Low                       | 8           |
| Lussier 2012 [59]          | 23                 | 68.5              | 78.3            | 28.5                | Attention   | Group    | Dual-task training                   | 5                        | 5                     | 60                  | 2–3                      | Passive | High                      | 7           |

**Table 1. Cont.**

| Study                 | Study Demographics |                   |                   | Intervention Design |             |          |                          | Study Design and Quality |                       |                     |                          |         |                           |             |
|-----------------------|--------------------|-------------------|-------------------|---------------------|-------------|----------|--------------------------|--------------------------|-----------------------|---------------------|--------------------------|---------|---------------------------|-------------|
|                       | N                  | Mean Age          | Percent Female    | MMSE Score          | CCT Type    | Delivery | Program                  | Dose <sup>a</sup>        | Sessions <sup>b</sup> | Length <sup>c</sup> | Sessions/wk <sup>d</sup> | Control | Risk of Bias <sup>e</sup> | PEDro Score |
| Mahncke 2006 [46]     | 123                | 70.9 <sup>g</sup> | 50 <sup>g</sup>   | ≥24                 | Multidomain | Home     | PS Brain Fitness         | 40                       | 40                    | 60                  | 5                        | Active  | High                      | 7           |
| Mailhot 2012 [23]     | 30                 | 73.5              | 84.4              | 28.0                | Multidomain | Group    | Exergames (Nintendo Wii) | 24                       | 24                    | 60                  | 2                        | Passive | High                      | 5           |
| Mayas 2014 [60]       | 27                 | 68.6              | 48.1              | 28.5                | Multidomain | Group    | Lumosity                 | 20                       | 20                    | 60                  | 2                        | Passive | High                      | 3           |
| McAvinue 2013 [82]    | 36                 | 70.4              | 63.9              | 28.1                | WM          | Home     | In-house program         | 14.75                    | 25                    | 35                  | 5                        | Active  | High                      | 4           |
| Miller 2013 [72]      | 69                 | 81.9              | 67.7              | 28.0                | Multidomain | Home     | Dakim Brain Fitness      | 15                       | 40                    | 23                  | 5                        | Passive | High                      | 6           |
| Nouchi 2012 [24]      | 28                 | 69.1              |                   | 28.5                | Multidomain | Home     | Brain Age (Nintendo DS)  | 5                        | 20                    | 15                  | 5                        | Active  | Low                       | 7           |
| O'Brien 2013 [61]     | 22                 | 71.9              | 50                | 28.1                | Multidomain | Group    | PS InSight               | 17                       | 14                    | 70                  | 2                        | Passive | Low                       | 7           |
| Peng 2012 [62]        | 50                 | 70.4              | 80.8 <sup>g</sup> |                     | SOP         | Group    | Figure comparison        | 5                        | 5                     | 45–60               | 1                        | Passive | High                      | 5           |
| Peretz 2011 [87]      | 155                | 67.8              | 62                | 29.0                | Multidomain | Home     | CogniFit                 | 16                       | 36                    | 25                  | 3                        | Active  | Low                       | 8           |
| Rasmusson 1999 [73]   | 24                 | 79.2              |                   | 27.8                | Multidomain | Group    | CNT                      | 14                       | 9                     | 90                  | 1                        | Passive | Low                       | 7           |
| Richmond 2011 [74]    | 40                 | 66.0              | 80                | 29.0                | WM          | Home     | In-house program         | 10                       | 20                    | 30                  | 4                        | Active  | High                      | 6           |
| Sandberg 2014 [83]    | 30                 | 69.3              | 56.7              | 28.9                | Multidomain | Group    | In-house program         | 11                       | 15                    | 45                  | 3                        | Passive | High                      | 6           |
| Shatil 2013 [75]      | 62                 | 80.5              | 70                | ≥24                 | Multidomain | Group    | CogniFit                 | 32                       | 48                    | 40                  | 3                        | Active  | High                      | 5           |
| Shatil 2014 [84]      | 109                | 68.3              | 34.9              | 28.6                | Multidomain | Group    | CogniFit                 | 8                        | 24                    | 20                  | 3                        | Active  | High                      | 6           |
| Simpson 2012 [86]     | 34                 | 62.3              | 52.9              | ≥27                 | Multidomain | Home     | MyBrainTrainer           | 7                        | 21                    | 20                  | 7                        | Active  | High                      | 7           |
| Smith 2009 [25]       | 487                | 75.3              | 52.4              | 29.2                | Multidomain | Home     | PS Brain Fitness         | 40                       | 40                    | 60                  | 5                        | Active  | Low                       | 9           |
| Stern 2011 [76]       | 40                 | 66.7              | 54                |                     | Attention   | Group    | Space Fortress           | 36                       | 36                    | 60                  | 3                        | Passive | High                      | 7           |
| van Muijden 2012 [63] | 72                 | 67.6              | 44.4              | 28.8                | Multidomain | Home     | In-house program         | 25                       | 49                    | 30                  | 7                        | Active  | High                      | 6           |
| Vance 2007 [51]       | 159                | 75.1              | 54.2              | 28.6                | SOP         | Group    | SOP                      | 10                       | 10                    | 60                  | 1                        | Active  | Low                       | 5           |
| von Bastian 2013 [85] | 57                 | 68.5              | 40.4              | ≥25                 | WM          | Home     | In-house program         | 16                       | 20                    | 27                  | 5                        | Active  | Low                       | 7           |
| Wang 2011 [88]        | 52                 | 64.2              | 67.3              | 28.4                | Attention   | Group    | In-house program         | 4                        | 5                     | 45                  | 1                        | Passive | High                      | 5           |
| Wolinsky 2011 [52]    | 456                | 61.9              | 62.4              |                     | SOP         | Group    | PS On the Road           | 10                       | 5                     | 120                 | 1                        | Active  | Low                       | 9           |

<sup>a</sup>Total number of training hours.

<sup>b</sup>Total number of CCT sessions.

<sup>c</sup>Session length (minutes).

<sup>d</sup>Number of sessions per week.

<sup>e</sup>Defined as having high or unclear risk of bias for blinding of assessors and/or incomplete outcome data.

<sup>f</sup>Measured with the Montreal Cognitive Assessment (MOCA, 1–30 scale).

<sup>g</sup>Means for the whole study (i.e., including groups that were not included in the analysis).

<sup>h</sup>Converted from the Modified Mental State Exam (3MSE, 1–100 scale) to Mini-Mental State Examination (1–30 scale).

<sup>i</sup>Measured with the St. Louis University Mental Status exam (SLUMS, 1–30 scale).

CNT, Colorado Neuropsychology Tests; MMSE, Mini-Mental State Examination; PS, Posit Science.

doi:10.1371/journal.pmed.1001756.t001

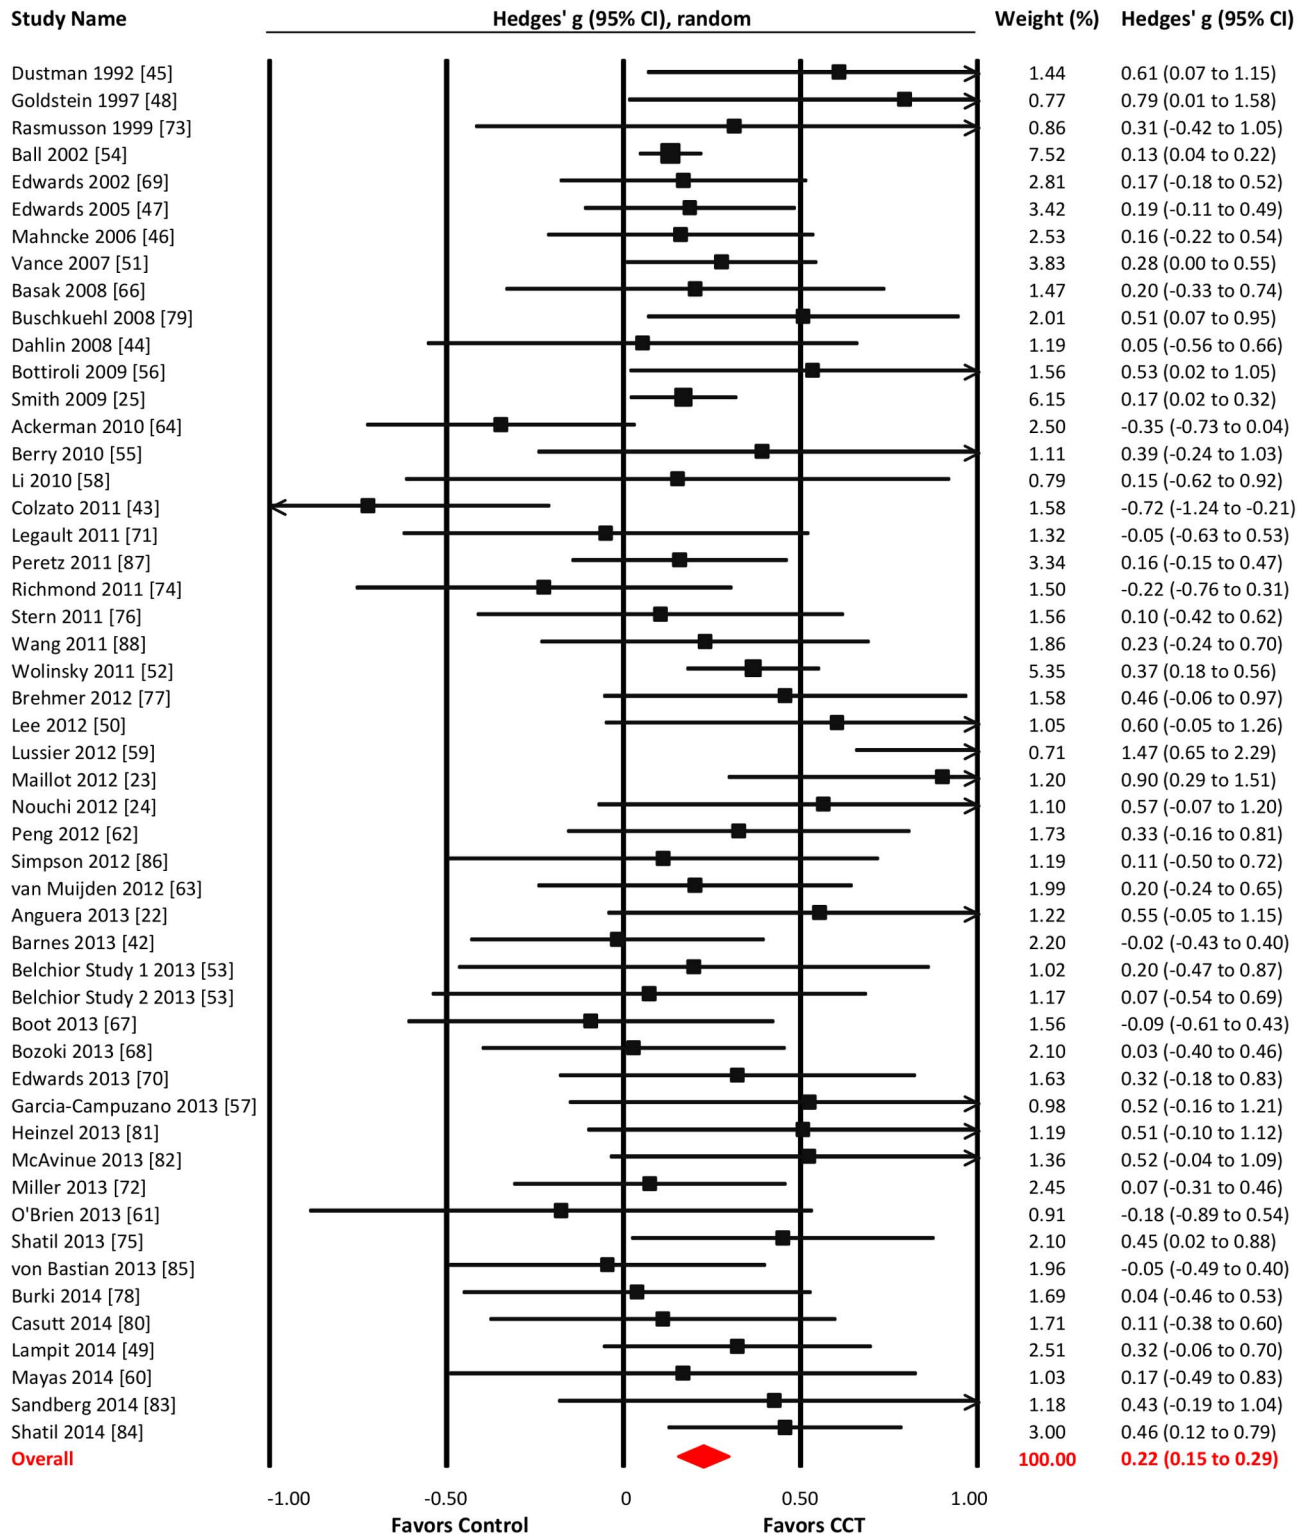

Tests for heterogeneity:  $\chi^2=71.35$ ,  $df=50$ ,  $P=0.03$ ,  $I^2=29.92$  (0.63 to 50.57)  
 Test for overall random effect:  $Z=6.07$ ,  $P<0.001$

**Figure 2. Overall efficacy of CCT on all cognitive outcomes.** Effect estimates are based on a random-effects model, and studies are ranked by year of publication. doi:10.1371/journal.pmed.1001756.g002

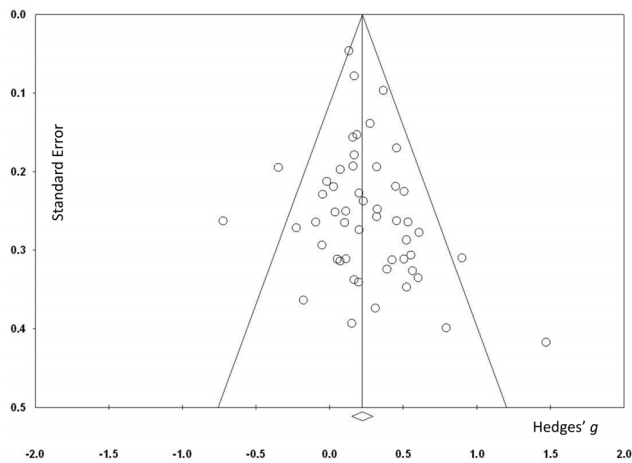

**Figure 3. Funnel plot for overall effects after removal of one outlier [65].**

doi:10.1371/journal.pmed.1001756.g003

determine the overall efficacy of CCT in enhancing cognition. Second, we performed domain-specific meta-analyses, in which only studies that reported outcomes on a specified cognitive domain were included, using one combined SMD per study. Third, to examine between-study variability and identify design elements that may moderate observed efficacy, we performed subgroup meta-analyses. In the first and second stages, the overall and domain-specific meta-analyses were performed using a random-effects model. Using the same convention for description of Cohen's *d* effect sizes applied to Hedges' *g*, SMDs of  $\leq 0.30$ ,  $> 0.30$  and  $< 0.60$ , and  $\geq 0.60$  were considered small, moderate, and large, respectively. Heterogeneity across studies was assessed using the  $I^2$  statistic with 95% confidence (uncertainty) intervals [32,33].  $I^2$  values of 25%, 50%, and 75% imply small, moderate, and large heterogeneity, respectively [33]. Forest plots were also used to visually characterize heterogeneity.

In the third stage, subgroup analyses were based on a mixed-effects model, which uses a random-effects model to generate within-subgroup variance and a fixed-effects model to compare effects between subgroups [34]. Between-subgroup heterogeneity was tested using the Cochrane's *Q* statistic [27] and was defined significant at the  $p < 0.05$  level. The following moderating factors were included in our analysis plan: type of CCT program (i.e., cognitive content of training), delivery format (group or home-based training), session length, session frequency, total duration of the program (dose), control condition (active or passive control), and risk of bias (high or low risk of bias as defined above).

### Risk of Bias across Studies

In order to assess risk of publication bias, funnel plots for overall outcomes as well as for each cognitive domain were inspected for asymmetry (i.e., SMDs charted against their standard error) [35]. When ten or more studies were pooled in a given meta-analysis, we formally tested funnel plot asymmetry using Egger's test of the intercepts [36]. A positive intercept implies that smaller studies tended to report more positive results than larger trials. When the test found notable asymmetry ( $p < 0.1$ ), we report primary outcomes based on a fixed-effects model along with a random-effects model, as the former gives more weight to larger trials and helps to counterbalance a possible inflation of therapeutic effect [35]; in these cases we discuss the more conservative effect estimate.

### Sensitivity Analyses

For the main analysis (efficacy across all cognitive outcomes), we tested the robustness of our results to parametric variation of the following assumptions: test-retest correlation (set at 0.6 and tested from 0.5 to 0.7), within-study multiple outcome intercorrelation (set at 0.7 and tested from 0.6 to 0.8), inclusion of passive controls instead of active controls in studies with multiple controls ( $k = 3$ ), and use of a fixed-effects model instead of a random-effects model. These results are reported in Table S5.

## Results

### Study Selection

After duplicate search results were removed, 6,294 studies were initially screened for eligibility, of which 5,974 were excluded based on abstract and title. Three hundred twenty full-text articles were assessed for eligibility, of which 45 were deemed potentially eligible. After consulting with authors, three studies were excluded because they did not use randomized assignment [37–39], and a further two studies because authors did not provide necessary data [40,41]. The resulting 40 studies from electronic search were supplemented by 11 studies [42–52] obtained by scanning reference lists of previous reviews and consulting with researchers, providing a total of 51 articles included in the analysis (Figure 1). Data from one article [53] were split into two studies, resulting in a final number of datasets cited in this review of 52 (for a detailed description of groups selected from each study, see Table S2).

We contacted 51 authors to request detailed summary data, enquire about possible eligibility, or determine risk of bias. Of these, 40 responded and provided information, two responded but did not provide information, and nine did not respond. Data for 14 studies were provided by authors [22,23,42,49,54–63] (see Table S3). The complete dataset is provided here as Dataset S1.

### Characteristics of Included Studies

Overall, the 52 datasets included in this review encompassed 4,885 participants (CCT,  $n = 2,527$ , mean group size = 49; controls  $n = 2,358$ , mean group size = 45; Table 1) and reported 396 cognitive outcomes. Mean participant age ranged from 60 to 82 y, and about 60% of participants were women. The cohorts were largely from the US [22,25,42,45–47,51–55,61,64–76] or Europe [23,43,44,48,56,60,63,77–85], in addition to studies from Canada [57–59], Australia [49,86], Israel [87], China [62], Taiwan Special Administrative Region [88], Republic of Korea [50], and Japan [24]. One study [49] was by authors of this review.

An active control group was used in 26 studies (50%), and assessor blinding was confirmed in 24 (46.2%) of studies. The average PEDro score was 6.2/9 (SD = 1.35), and 35 (66.6%) studies were found to have a high risk of bias (Table S4). As expected, risk of bias and study quality were connected: significant differences in PEDro scores were found for studies with high risk of bias (mean PEDro score = 5.69, SD = 1.08) compared to studies with low risk of bias (mean PEDro score = 7.18, SD = 1.33;  $t_{(50)} = -4.324$ ,  $p < 0.001$ ).

Type of CCT varied considerably across studies (Table 1). Twenty-four studies used multidomain training, nine used SOP training, nine used WM training, six used attention training, and four were video games. Group (center-based) training was conducted in 32 (61.5%) of the studies, and 19 (36.5%) provided training at home. A study by Berry et al. [55] combined data from participants who trained at home with others who trained in research offices, and was therefore excluded from our subgroup analysis of delivery mode. In a study by Shatil et al. [84], 50 participants received group-based CCT and ten trained at home; data for the latter ten participants were excluded from the analysis (raw data for this study were provided in

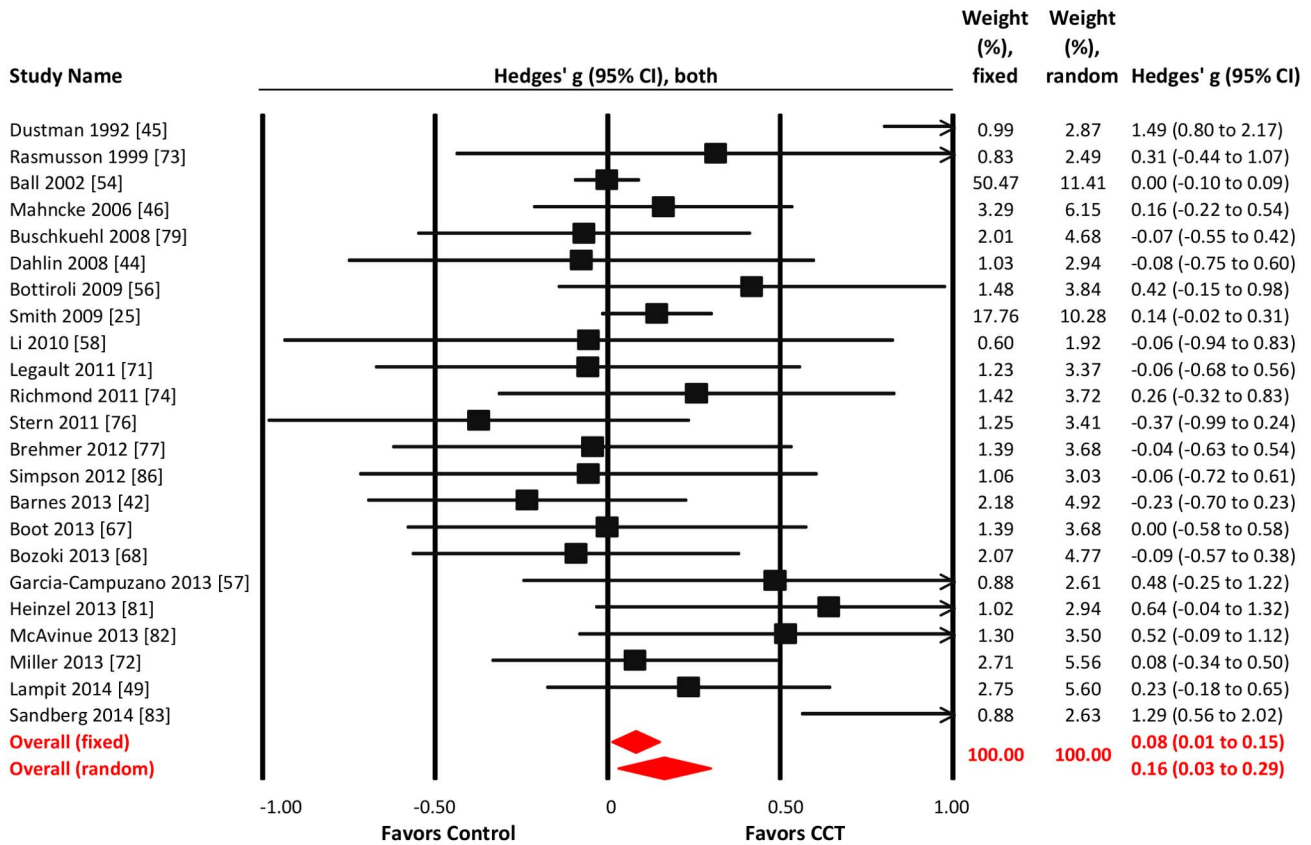

Tests for heterogeneity:  $\chi^2=44.10$ ,  $df=22$ ,  $P=0.003$ ,  $I^2=50.12$  (19.31 to 69.16)  
 Test for overall fixed effect:  $Z=2.23$ ,  $P=0.03$   
 Test for overall random effect:  $Z=2.36$ ,  $P=0.02$

**Figure 4. Efficacy of CCT on measures of verbal memory.** Effect estimates are based on fixed-effects (top) and random-effects (bottom) models, and studies are rank-ordered by year of publication.  
 doi:10.1371/journal.pmed.1001756.g004

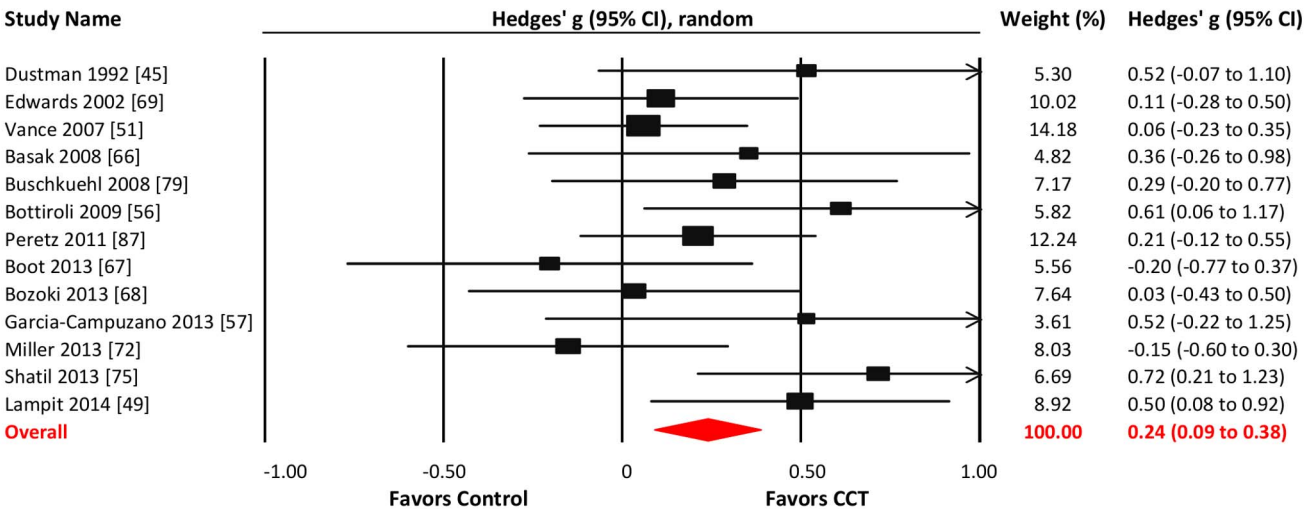

Tests for heterogeneity:  $\chi^2=15.90$ ,  $df=12$ ,  $P=0.20$ ,  $I^2=24.52$  (0.00 to 60.75)  
 Test for overall random effect:  $Z=3.14$ ,  $P=0.002$

**Figure 5. Efficacy of CCT on measures of nonverbal memory.** Effect estimates are based on a random-effects model, and studies are rank-ordered by year of publication.  
 doi:10.1371/journal.pmed.1001756.g005



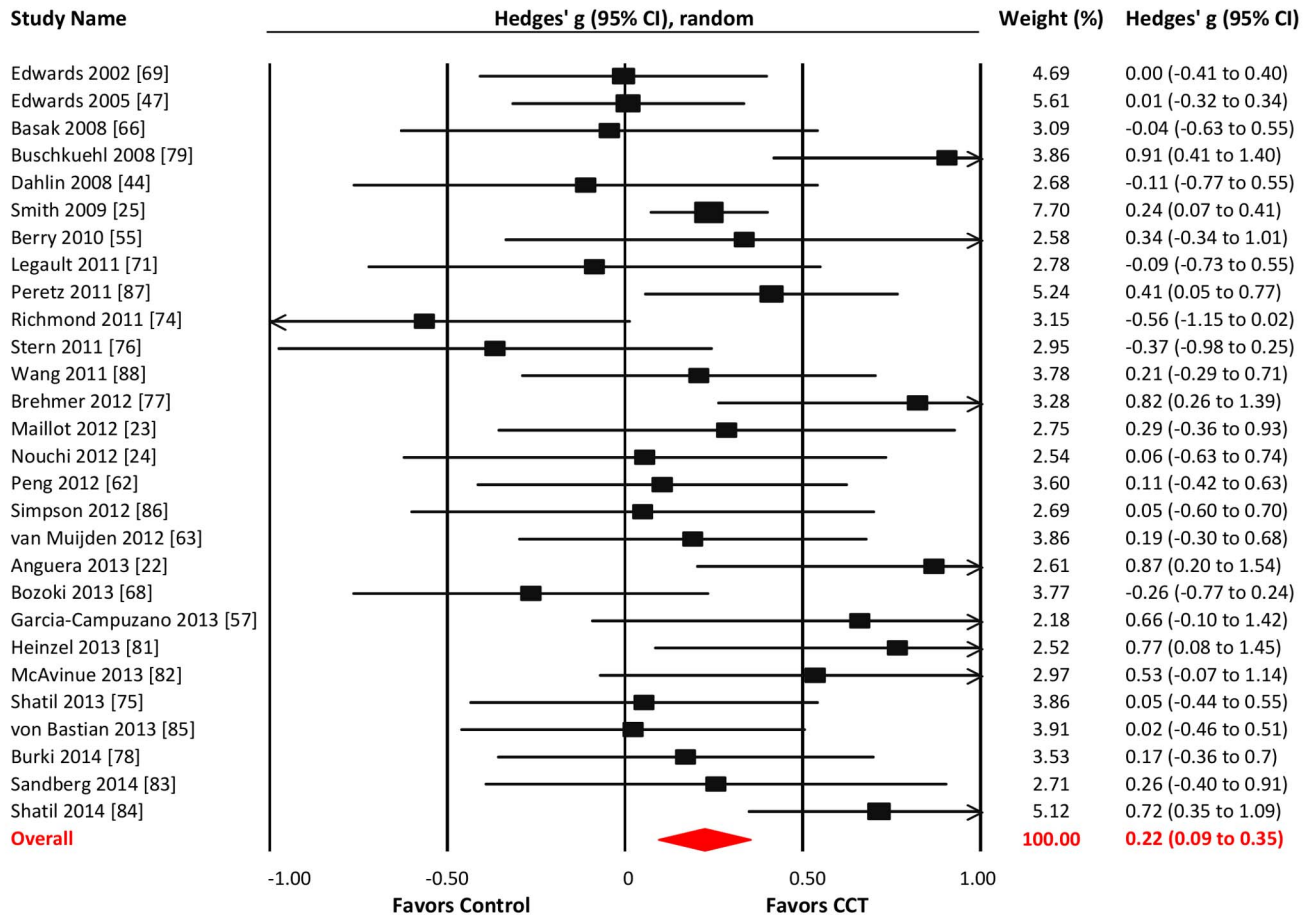

Tests for heterogeneity:  $\chi^2=49.59$ ,  $df=27$ ,  $P=0.005$ ,  $I^2=45.55$  (15.05 to 65.1)  
 Test for overall random effect:  $Z=3.35$ ,  $P<0.001$

**Figure 6. Efficacy of CCT on measures of working memory.** Effect estimates are based on a random-effects model, and studies are rank-ordered by year of publication.  
 doi:10.1371/journal.pmed.1001756.g006

the online publication). Twenty-nine studies trained participants 2–3 times per week, 17 administered more than three sessions per week, and six administered only one session per week. Results of individual studies are provided in Table S2.

**Overall Efficacy on Cognitive Outcomes**

The overall effect of CCT on cognition was small and statistically significant ( $g = 0.28$ , 95% CI 0.18 to 0.39,  $p < 0.001$ ). Heterogeneity across studies was moderate ( $I^2 = 69.03\%$ , 95% CI 58.87% to 76.68%). The forest plot revealed one conspicuous outlier [65]: this study reported two extremely large SMDs ( $g > 3.0$ ; see Table S2) considered implausible and so was removed from all further analyses. Following this, heterogeneity reduced to a low level, and the summary effect size was reduced ( $g = 0.22$ , 95% CI 0.15 to 0.29,  $p < 0.001$ ;  $I^2 = 29.92\%$ , 95% CI 0.63% to 50.57%; Figure 2). The resulting funnel plot did not show significant asymmetry (Egger’s intercept = 0.48,  $p = 0.12$ ; Figure 3). These results were robust to sensitivity analyses around our major assumptions (Table S5).

**Domain-Specific Efficacy**

**Verbal memory.** Twenty-three studies reported verbal memory outcomes. The combined effect size was small and

statistically significant ( $g = 0.16$ , 95% CI 0.03 to 0.29,  $p = 0.02$ ; Figure 4). Heterogeneity across studies was moderate ( $I^2 = 50.12\%$ , 95% CI 19.31% to 69.16%). The Funnel plot showed potential asymmetry (Egger’s intercept = 0.81,  $p = 0.07$ ; Figure S1). A fixed-effects analysis was therefore conducted and revealed a very small effect size ( $g = 0.08$ , 95% CI 0.01 to 0.15,  $p = 0.03$ ; Figure 4).

**Nonverbal memory.** Thirteen studies reported nonverbal memory outcomes. The combined effect size was small and statistically significant ( $g = 0.24$ , 95% CI 0.09 to 0.38,  $p = 0.002$ ; Figure 5). Heterogeneity across studies was small ( $I^2 = 24.52\%$ , 95% CI 0% to 60.75%), and the funnel plot did not show evidence of asymmetry (Egger’s intercept = 1.75  $p = 0.18$ ; Figure S1).

**Working memory.** Twenty-eight studies reported WM outcomes. The combined effect size was small and statistically significant ( $g = 0.22$ , 95% CI 0.09 to 0.35,  $p < 0.001$ ; Figure 6). Heterogeneity across studies was moderate ( $I^2 = 45.55\%$ , 95% CI 15.05% to 65.1%). The funnel plot did not show significant asymmetry (Egger’s intercept = -0.1,  $p = 0.89$ ; Figure S1).

**Processing speed.** Thirty-three studies reported processing speed outcomes. The combined effect size was moderate and statistically significant ( $g = 0.31$ , 95% CI 0.11 to 0.50,  $p = 0.002$ ; Figure 7). Heterogeneity across studies was large ( $I^2 = 84.53\%$ ,

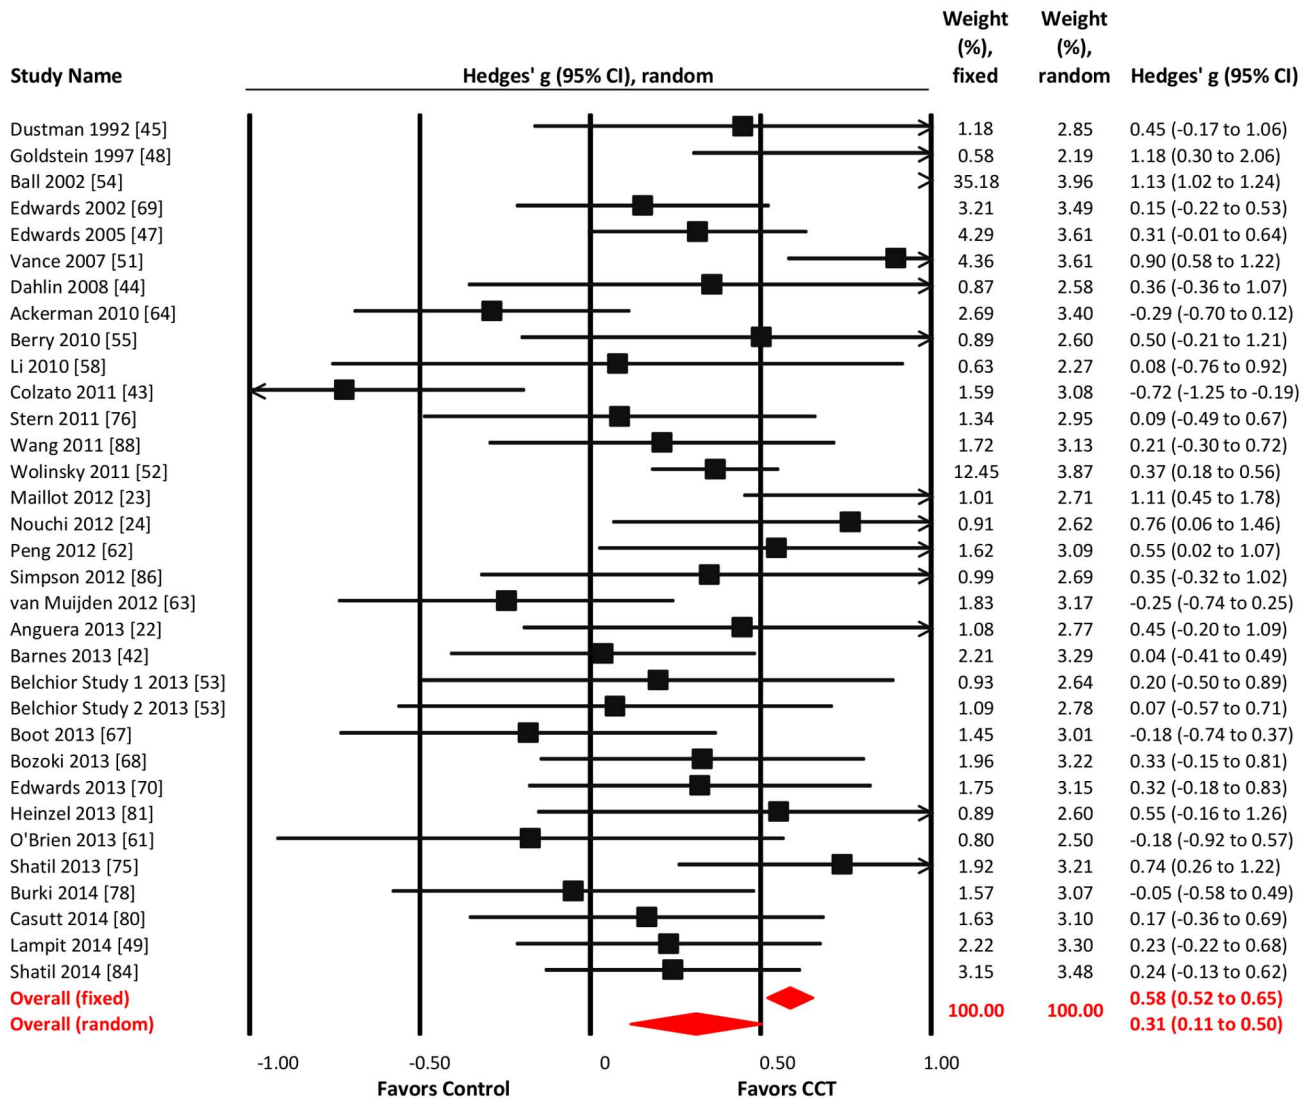

Tests for heterogeneity:  $\chi^2=206.90$ ,  $df=32$ ,  $P<0.001$ ,  $I^2=84.53$  (79.23 to 88.48)  
 Test for overall fixed effect:  $Z=17.07$ ,  $P<0.001$   
 Test for overall random effect:  $Z=3.11$ ,  $P=0.002$

**Figure 7. Efficacy of CCT on measures of processing speed.** Effect estimates are based on fixed-effects (top) and random-effects (bottom) models, and studies are rank-ordered by year of publication. doi:10.1371/journal.pmed.1001756.g007

95% CI 79.23% to 88.48%). We detected evidence of unusual funnel plot asymmetry, whereby larger studies reported larger effect sizes (Egger's intercept = -2.99,  $p<0.01$ ; Figure S1). A fixed-effects analysis revealed a substantially larger effect size ( $g=0.58$ , 95% CI 0.52 to 0.65,  $p<0.001$ ; Figure 4).

**Executive functions.** Twenty-nine studies reported outcomes with measures of executive functions. The combined effect size was negligible and statistically non-significant ( $g=0.09$ , 95% CI -0.02 to 0.19,  $p=0.096$ ; Figure 8). Heterogeneity across studies was small ( $I^2=31.82\%$ , 95% CI 0% to 56.78%). The funnel plot suggested larger effect sizes in smaller studies (Egger's intercept = 0.65,  $p=0.097$ ; Figure S1).

**Attention.** Eleven studies reported attention-related outcomes. The combined effect size was small and non-

significant ( $g=0.24$ , 95% CI -0.01 to 0.50,  $p=0.06$ ; Figure 9). Heterogeneity across studies was moderate ( $I^2=62.97\%$ , 95% CI 28.98% to 80.69%). The funnel plot did not display notable asymmetry (Egger's intercept = 2.61,  $p=0.13$ ; Figure S1).

**Visuospatial skills.** Eight studies reported visuospatial outcomes. The combined effect size was small and statistically significant ( $g=0.22$ , 95% CI 0.15 to 0.29,  $p=0.01$ ; Figure 10). Heterogeneity across studies was moderate ( $I^2=42.66\%$ , 95% CI 0% to 74.65%). The funnel plot revealed potential asymmetry, suggesting a greater effect in smaller studies (Figure S1), but formal testing was not conducted because of the small number of studies.

**Global cognition and language.** Planned analyses of global cognition and language were not performed as these outcomes were reported in only three studies each ([24,50,88] and [49,72,75], respectively).

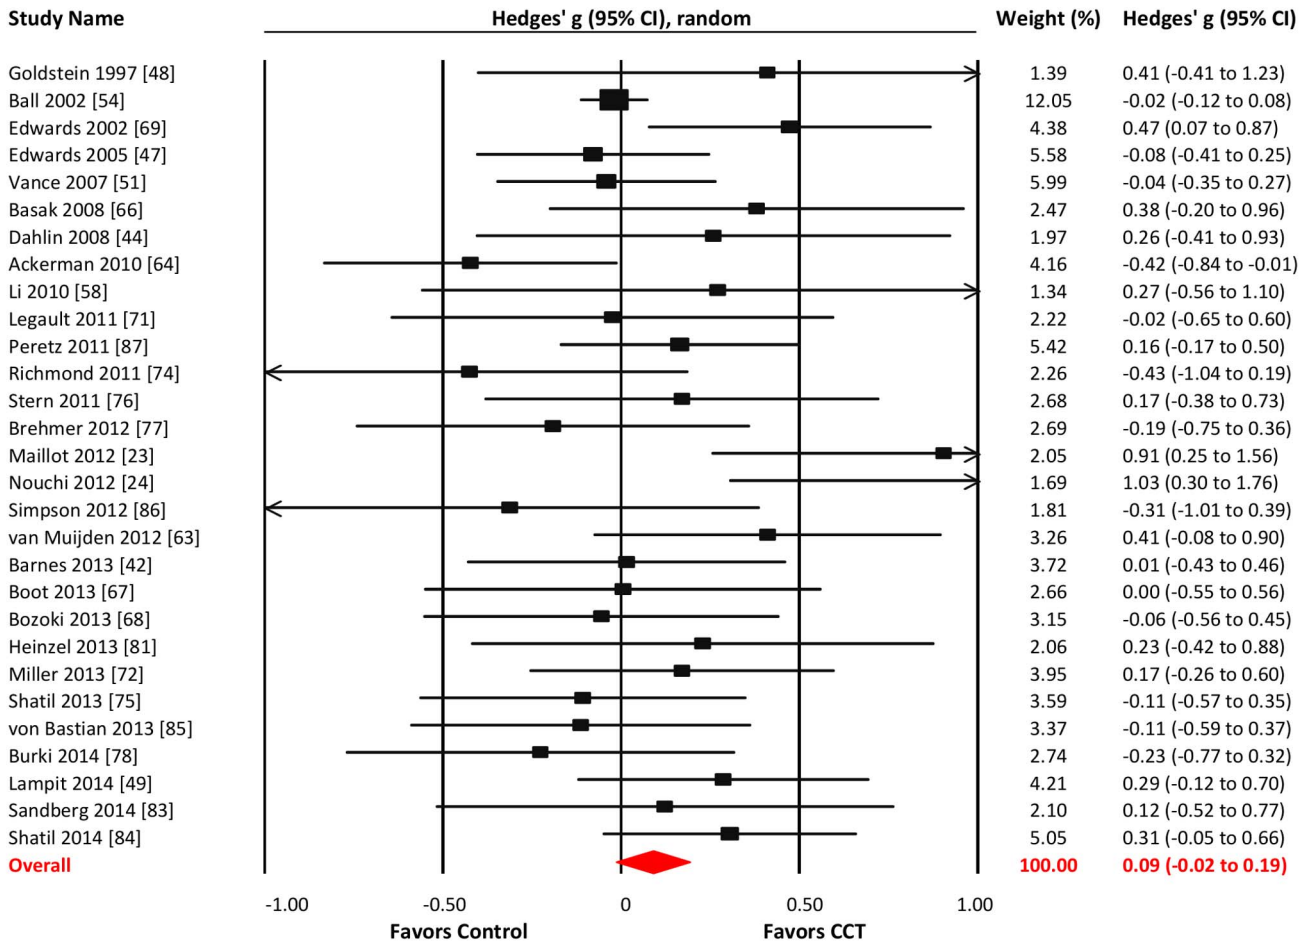

Tests for heterogeneity:  $\chi^2=41.07$ ,  $df=28$ ,  $P=0.05$ ,  $I^2=31.82$  (0.00 to 56.78)  
 Test for overall random effect:  $Z=1.67$ ,  $P=0.096$

**Figure 8. Efficacy of CCT on measures of executive functions.** Effect estimates are based on a random-effects model, and studies are rank-ordered by year of publication.  
 doi:10.1371/journal.pmed.1001756.g008

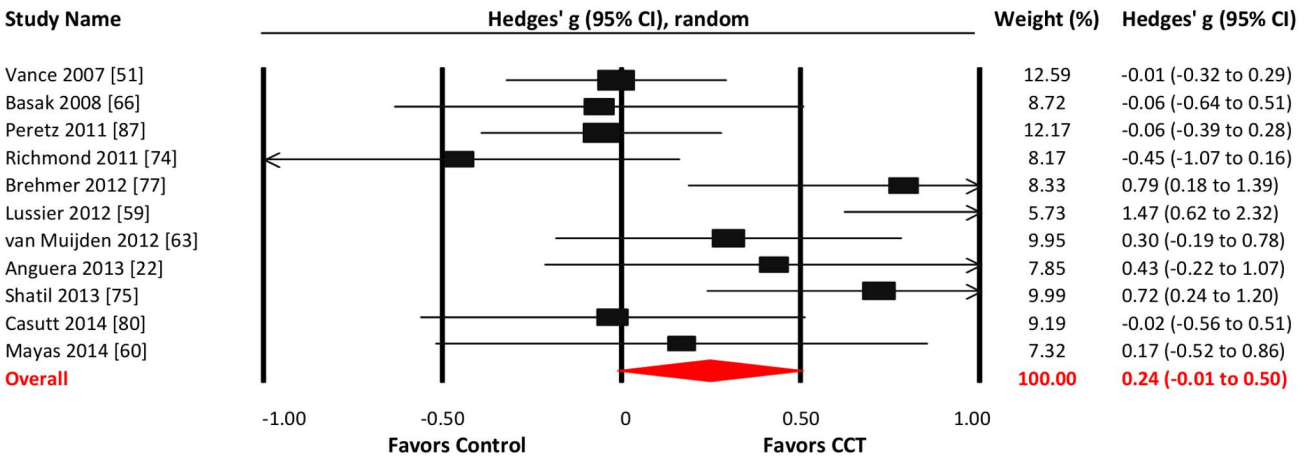

Tests for heterogeneity:  $\chi^2=27.00$ ,  $df=10$ ,  $P=0.003$ ,  $I^2=62.97$  (28.98 to 80.69)  
 Test for overall random effect:  $Z=1.86$ ,  $P=0.06$

**Figure 9. Efficacy of CCT on measures of attention.** Effect estimates are based on a random-effects model, and studies are rank-ordered by year of publication.  
 doi:10.1371/journal.pmed.1001756.g009

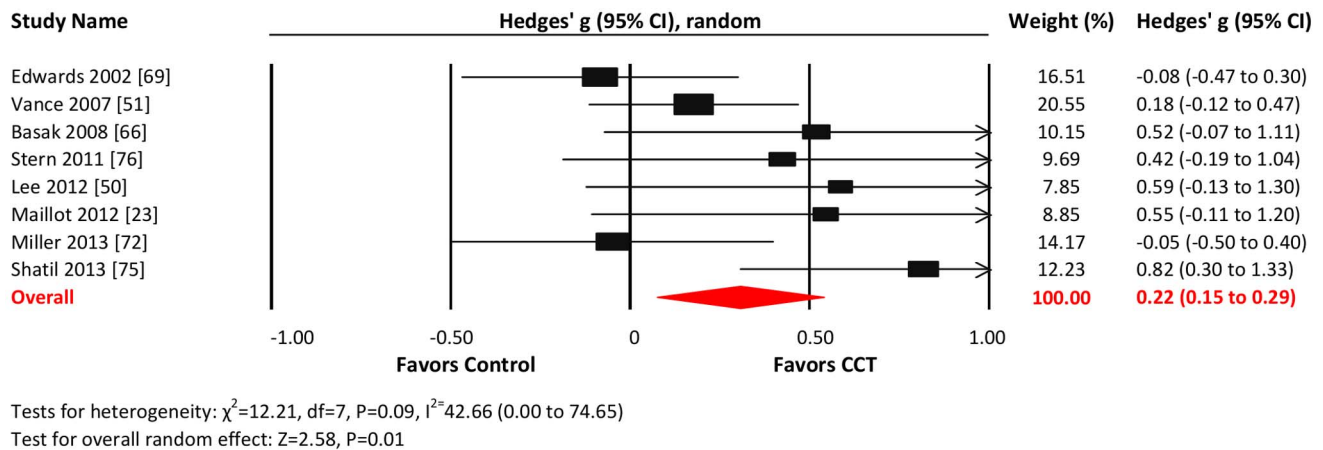

**Figure 10. Efficacy of CCT on measures of visuospatial skills.** Effect estimates are based on a random-effects model, and studies are rank-ordered by year of publication. doi:10.1371/journal.pmed.1001756.g010

**Moderators of CCT Efficacy**

In order to examine the relationship between CCT design choices and training outcomes, we evaluated efficacy in predefined subgroups (Figure 11). Based on all cognitive outcomes, there was a significant difference in the efficacy of group-based training ( $g = 0.29$ , 95% CI 0.21 to 0.38,  $p < 0.001$ ) compared to home-based administration ( $g = 0.09$ , 95% CI  $-0.02$  to 0.21,  $p = 0.11$ ;  $Q$  statistic for between-group heterogeneity = 7.183,  $df = 1$ ,  $p = 0.007$ ). Study-to-study heterogeneity within the group-based training studies was low ( $I^2 = 11.88\%$ , CI 0% to 43%;  $Q = 35.18$ ,  $df = 31$ ,  $p = 0.28$ ; Figure 11). There was also a significant effect for training frequency, with significant effect estimates in studies that administered one ( $g = 0.34$ , 95% CI 0.16 to 0.51,  $p < 0.001$ ) or 2–3 sessions per week ( $g = 0.28$ , 95% CI 0.18 to 0.37,  $p < 0.001$ ) but not in studies that trained their participants more than three times per week ( $g = 0.07$ , 95% CI  $-0.06$  to 0.19,  $p = 0.28$ ;  $Q = 9.082$ ,  $df = 2$ ,  $p = 0.011$ ). Within-subgroup heterogeneity was low for training either once per week ( $I^2 = 0\%$ , 95% CI 0% to 0%;  $Q = 1.04$ ,  $df = 5$ ,  $p = 0.96$ ) or 2–3 times per week (18.93%, 95% CI 0% to 49%;  $Q = 34.54$ ,  $df = 28$ ,  $p = 0.18$ ). The intersection of these two moderators (group- versus home-based administration and number of sessions per week), i.e., group-based CCT studies that administered 2–3 sessions per week, comprised a subset of  $k = 25$  studies and produced a similar effect estimate:  $g = 0.29$ , 95% CI 0.18 to 0.39,  $p < 0.001$ ;  $Q$  statistic for within-subgroup heterogeneity = 30.84,  $df = 24$ ,  $p = 0.16$ ;  $I^2 = 22.18\%$ , CI 0% to 52.44%.

A similar sequence of moderator analyses for each cognitive domain can be found in Figures S2, S3, S4, S5, S6, S7, S8. A summary of these outcomes is visually presented in Figure 12, a matrix that shows color-coded SMDs for each cognitive domain by each moderating factor. From this figure it is evident that there is no positive evidence for the efficacy of training involving WM (based on either all studies or by subgroup), nor for training administered more than three sessions per week, for any of the cognitive outcomes in this review. At the domain-specific level, evidence for the efficacy of CCT training at home, training only once per week, or in sessions shorter than 30 min is weak.

**Discussion**

CCT research involving healthy older participants has now matured to a substantial literature, encompassing 51 RCTs of

reasonable quality. When examined en masse, CCT is effective at enhancing cognitive function in healthy older adults, but small effect sizes are to be expected. By definition this result pertains to the theoretical “average” older person—it is currently not possible to predict whether a given individual’s cognitive abilities will improve beyond normal practice effects. More importantly, the efficacy of CCT depends on particular design choices as well as the cognitive outcome of interest. Moderator analyses revealed the inefficacy of home-based training compared to group-based training, as well as training more than three times a week. Domain-specific analyses found evidence of efficacy for nonverbal memory, processing speed, WM, and visuospatial outcomes, but not for attention and executive functions. Equally important, we found consistent evidence for the likely inefficacy of WM training and the use of brief training sessions.

Evidence of possible publication bias was found only for reports of verbal memory outcomes. In this case a more conservative fixed-effects model was used and found that CCT efficacy in this domain is weak at best ( $g = 0.08$ , 95% CI 0.01 to 0.15). Somewhat atypically, the funnel plot for SOP outcomes found that the largest trials tended to find the largest effect sizes. Given that more than half of all participants in this systematic review undertook speed-based training [47,50–55,59,69], whose efficacy does not generalize beyond speed-based outcomes (Figure 12), it is possible this is a peculiarity of studies focused on speed training and testing.

Analyses of verbal memory and executive outcomes were sufficiently powered, encompassing 23 and 29 trials, respectively, yet yielded negligible effects. Whilst we recognize that no universal consensus is possible when classifying cognitive tests to particular domains, we consulted a widely cited textbook [21] for this task (see Table S1), and so the negative results for verbal memory and executive outcomes likely represent deficits in the efficacy of CCT in healthy older individuals. Further research aimed at assessing the therapeutic responsiveness of these two key cognitive domains is required, along with development of new and better targeted CCT technology. Consideration should also be given to combining CCT with other effective interventions, such as physical exercise for executive functions [89] and memory strategy training for verbal memory [90].

At the same time, the therapeutic value of several commonly implemented CCT design choices come under question. We found that WM training alone was not effective in healthy older adults, similar to the limited effects reported in a recent meta-analysis in

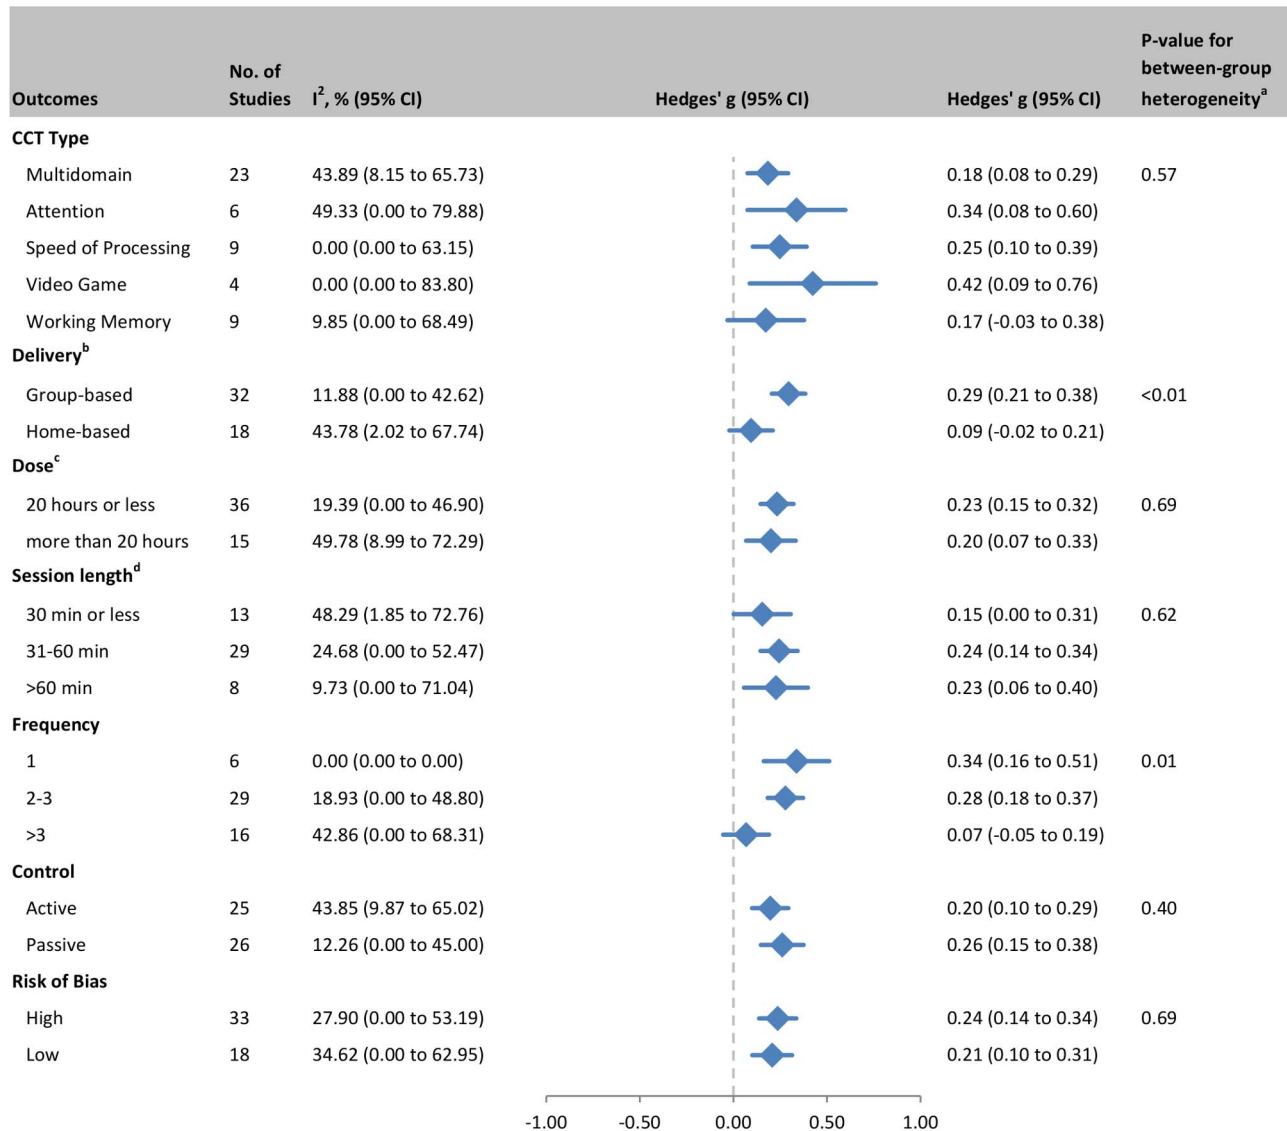

**Figure 11. Subgroup analyses of moderators of overall efficacy of CCT in older adults.** <sup>a</sup>Q-test for between-group heterogeneity, mixed-effects model. <sup>b</sup>One study that combined data from both home- and group-based training [55] was excluded from this analysis. <sup>c</sup>Total number of training hours. <sup>d</sup>Session length could not be determined for one study. doi:10.1371/journal.pmed.1001756.g011

children and young adults [91]. The Finnish Geriatric Intervention Study to Prevent Cognitive Impairment and Disability (FINGER) [92] is a major trial in progress that involves WM training along with other lifestyle-based interventions, and may shed light on the utility (or lack thereof) of this kind of CCT.

One of the attractions of home-based (often Internet-delivered) CCT is the ability to administer a customized and adaptive intervention in the individual's home, with potential for decreased implementation cost [9] and the facility to target the frail and immobile. However, our formal moderator analysis (based on the conservative *Q* statistic) revealed a significant interaction between delivery setting and therapeutic outcome, whereby group-based delivery was effective ( $g = 0.29$ , 95% CI 0.21 to 0.38) and home-based delivery was not ( $g = 0.09$ , 95% CI  $-0.02$  to 0.21). A high degree of consistency amongst group-based training studies suggests that this conclusion is robust (Figure 11). If translated to Mini-Mental State Examination scores, this group-based CCT

effect may approximate an average relative improvement of one point [93]. Potentially relevant practice variables when conducting group-based CCT include direct supervision by a trainer to help ensure adherence, treatment fidelity, and compliance; provision of motivational support and encouragement to master challenging tasks that are otherwise easy to avoid; problem solving of IT issues; and nonspecific factors such as social interaction. Indeed, a meta-analysis of memory training in older adults also found that group-based administration was a moderating factor [94]. When conducting CCT, group setting may therefore represent a key therapeutic consideration. Conversely, the popular model of purely home-based training is unlikely to result in cognitive benefits in unimpaired older adults. Future studies may wish to investigate the value of combining initial group-based administration with more long-lasting home-based CCT, as well as test emerging technologies that allow remote clinical supervision and interaction via social media.

|                |                     | Overall | Processing speed | Non-verbal memory | Visuospatial       | Working memory     | Verbal memory <sup>a</sup> | Attention          | Executive functions |
|----------------|---------------------|---------|------------------|-------------------|--------------------|--------------------|----------------------------|--------------------|---------------------|
| All studies    |                     | 0.22**  | 0.31**           | 0.24**            | 0.22*              | 0.22**             | 0.08*                      | 0.24               | 0.09                |
| CCT type       | Multidomain         | 0.18**  | 0.16             | 0.25*             | 0.41               | 0.29**             | 0.13*                      | 0.28               | 0.14                |
|                | Attention           | 0.34*   | 0.20             |                   | 0.42 <sup>b</sup>  | 0.21               | -0.27                      | 0.54               | 0.20                |
|                | Speed of Processing | 0.25**  | 0.53**           | 0.08              | 0.17               | 0.08               | 0.00 <sup>b</sup>          | -0.01 <sup>b</sup> | 0.04                |
|                | Video Game          | 0.42*   | 0.56             | 0.44              | 0.52 <sup>b</sup>  | -0.04 <sup>b</sup> | 1.49** <sup>b</sup>        | -0.06 <sup>b</sup> | 0.39                |
|                | Working Memory      | 0.17    | 0.26             | 0.52 <sup>b</sup> |                    | 0.23               | 0.23                       | 0.17               | -0.09               |
| Delivery       | Group-based         | 0.29**  | 0.38**           | 0.32**            | 0.36**             | 0.22*              | 0.07                       | 0.30               | 0.13                |
|                | Home-based          | 0.09    | 0.11             | 0.03              | -0.05 <sup>b</sup> | 0.21*              | 0.10                       | 0.19               | 0.02                |
| Dose           | 20 hours or less    | 0.23**  | 0.34**           | 0.18              | 0.10               | 0.28**             | 0.05                       | 0.21               | 0.04                |
|                | more than 20 hours  | 0.20**  | 0.24             | 0.33**            | 0.60**             | 0.09               | 0.14*                      | 0.34               | 0.20*               |
| Session Length | 30 min or less      | 0.15*   | 0.03             | 0.14              | 0.19               | 0.28*              | 0.12                       | 0.14               | 0.09                |
|                | 31-60 minutes       | 0.24**  | 0.33**           | 0.23*             | 0.33*              | 0.20*              | 0.15**                     | 0.39               | 0.09                |
|                | >60 minutes         | 0.23**  | 0.42*            | 0.50*             | 0.52 <sup>b</sup>  | -0.04 <sup>b</sup> | 0.01                       | -0.06 <sup>b</sup> | 0.07                |
| Frequency      | 1 session/wk        | 0.34**  | 0.51*            | 0.18              | 0.18 <sup>b</sup>  | 0.16               | 0.38                       | -0.01 <sup>b</sup> | -0.04 <sup>b</sup>  |
|                | 2-3 sessions/wk     | 0.28**  | 0.36**           | 0.35**            | 0.43**             | 0.30**             | 0.05                       | 0.32               | 0.16*               |
|                | >3 sessions/wk      | 0.07    | 0.10             | -0.10             | -0.05 <sup>b</sup> | 0.12               | 0.11                       | 0.22               | -0.02               |
| Control        | Active              | 0.20**  | 0.24             | 0.29**            | 0.46*              | 0.23**             | 0.14*                      | 0.20               | 0.02                |
|                | Passive             | 0.26**  | 0.37**           | 0.16              | 0.21               | 0.21*              | 0.04                       | 0.32               | 0.19*               |
| Risk of Bias   | High                | 0.24**  | 0.23*            | 0.19              | 0.32*              | 0.22**             | 0.17*                      | 0.33*              | 0.11                |
|                | Low                 | 0.21**  | 0.43**           | 0.30**            | 0.30               | 0.23               | 0.05                       | -0.04              | 0.06                |

**Figure 12. Overview of efficacy and moderators of efficacy for CCT in older adults.** Numbers refer to SMDs from an individual meta-analysis (see Figures S2, S3, S4, S5, S6, S7, S8 for details). Colored cells indicate significant outcomes, with effect sizes color coded: yellow,  $g < 0.3$ ; pink,  $g = 0.3-0.6$ ; red,  $g \geq 0.6$ . White depicts non-significant results, and grey shows where no studies were available for analysis. \* $p < 0.05$ , \*\* $p < 0.01$  for within-subgroup results (between-subgroup results are reported in Figures 11 and S2, S3, S4, S5, S6, S7, S8). <sup>a</sup>Based on a fixed-effects model because of evidence of potential publication bias in these outcomes. <sup>b</sup>SMD based on a single trial. doi:10.1371/journal.pmed.1001756.g012

We also found interesting evidence for the importance of correct CCT dose. The results suggested that short sessions of less than 30 min may be ineffective, possibly because synaptic plasticity is more likely after 30–60 min of stimulation [95]. By contrast, our analysis clearly identified that training more than three times per week neutralizes CCT efficacy (Figure 11). It is possible that there is a maximal dose for CCT, after which factors such as cognitive fatigue [96] may interfere with training gains. This might not be unique to older persons, as comparative studies in children [97] and young adults [98] have linked spaced training schedules with greater CCT efficacy.

**Limitations**

To our knowledge, this is the first quantitative meta-analysis of RCTs in the defined field of CCT in cognitively healthy older adults. As opposed to previous reviews that included various cognitive interventions and research designs [9,14–18], we employed strict eligibility criteria, allowing comparison of results across cognitive domains as well as testing of the impact of design factors. However, by way of limitation our results do not necessarily generalize to older impaired persons, especially the high-risk MCI population, where results appear to be mixed [99,100]. This review also focused on change in neuropsychological measures immediately after the end of training; it therefore

provides no indication about the durability of the observed gains, nor their transfer into real-life outcomes such as independence, quality of life, daily functioning, or risk of long-term cognitive morbidity. Because individual RCTs typically report multiple cognitive test results for a particular cognitive domain, these were combined statistically (as per prior practice [30,31]), but this approach is blind to the relative psychometric merits of the individual tests. More sophisticated analyses may therefore need to be developed that incorporate test-specific weightings when combining test outcomes. Finally, whilst the CCT literature is now substantive in terms of the number of RCTs ( $k = 51$ ), the typical trial was modest in size (median  $N = 45$ ). Future studies incorporating supervised group-based delivery and a session frequency of 2–3 sessions per week can anticipate an approximate effect size of  $g = 0.29$ , suggesting that a sample of 87 is sufficient to designate power at 0.8 and allow for 15% attrition.

**Conclusions**

Discussion of CCT tends to focus on whether it “works” rather than on what factors may contribute to efficacy and inefficacy [13,101]. This systematic review indicates that its overall effect on cognitive performance in healthy older adults is positive but small, and it is ineffective for executive functions and verbal memory. Accurate individual predictions are not possible. More important-

ly, our analysis shows that efficacy varies by cognitive outcome and is to a large extent determined by design choices. In general, group-based CCT is effective but home-based CCT is not, and training more than three times a week is counterproductive. Consistently ineffective design choices should therefore be avoided. Improving executive functions or verbal memory may require development of new technology or combined interventions. There remains great scope for additional research to further enhance this non-pharmacological intervention for older individuals.

## Supporting Information

**Figure S1 Funnel plots.** (A) Verbal memory, (B) nonverbal memory, (C) WM, (D) processing speed, (E) executive functions, (F) attention, and (G) visuospatial skills.  
(TIF)

**Figure S2 Moderators of efficacy of CCT for verbal memory.** <sup>a</sup>*Q*-test for between-group heterogeneity, fixed-effects model. <sup>b</sup>Total number of training hours.  
(TIF)

**Figure S3 Moderators of efficacy of CCT for nonverbal memory.** <sup>a</sup>*Q*-test for between-group heterogeneity, mixed-effects model. <sup>b</sup>Total number of training hours.  
(TIF)

**Figure S4 Moderators of efficacy of CCT for working memory.** <sup>a</sup>*Q*-test for between-group heterogeneity, mixed-effects model. <sup>b</sup>One study that combined data from both home- and group-based training [55] was excluded from this analysis. <sup>c</sup>Total number of training hours.  
(TIF)

**Figure S5 Moderators of efficacy of CCT for processing speed.** <sup>a</sup>*Q*-test for between-group heterogeneity, mixed-effects model. <sup>b</sup>One study that combined data from both home- and group-based training [55] was excluded from this analysis. <sup>c</sup>Total number of training hours. <sup>d</sup>Session length could not be determined for one study [48].  
(TIF)

**Figure S6 Moderators of efficacy of CCT for executive function.** <sup>a</sup>*Q*-test for between-group heterogeneity, mixed-effects model. <sup>b</sup>Total number of training hours. <sup>c</sup>Session length could not be determined for one study [48].  
(TIF)

## References

- Deary IJ, Corley J, Gow AJ, Harris SE, Houlihan LM, et al. (2009) Age-associated cognitive decline. *Br Med Bull* 92: 135–152.
- Graham JE, Rockwood K, Beattie BL, Eastwood R, Gauthier S, et al. (1997) Prevalence and severity of cognitive impairment with and without dementia in an elderly population. *Lancet* 349: 1793–1796.
- Plassman BL, Langa KM, McCammon RJ, Fisher GG, Potter GG, et al. (2011) Incidence of dementia and cognitive impairment, not dementia in the United States. *Ann Neurol* 70: 418–426.
- Unverzagt FW, Gao S, Baiyewu O, Ogunniyi AO, Gureje O, et al. (2001) Prevalence of cognitive impairment: data from the Indianapolis Study of Health and Aging. *Neurology* 57: 1655–1662.
- Zhu CW, Sano M, Ferris SH, Whitehouse PJ, Patterson MB, et al. (2013) Health-related resource use and costs in elderly adults with and without mild cognitive impairment. *J Am Geriatr Soc* 61: 396–402.
- Marioni RE, Valenzuela MJ, van den Hout A, Brayne C, Matthews FE, et al. (2012) Active cognitive lifestyle is associated with positive cognitive health transitions and compression of morbidity from age sixty-five. *PLoS ONE* 7: e50940.
- Verghese J, Lipton RB, Katz MJ, Hall CB, Derby CA, et al. (2003) Leisure activities and the risk of dementia in the elderly. *N Engl J Med* 348: 2508–2516.
- Wilson RS, Mendes De Leon CF, Barnes LL, Schneider JA, Bienias JL, et al. (2002) Participation in cognitively stimulating activities and risk of incident Alzheimer disease. *JAMA* 287: 742–748.
- Kueider AM, Parisi JM, Gross AL, Rebok GW (2012) Computerized cognitive training with older adults: a systematic review. *PLoS ONE* 7: e40588.
- Clare L, Woods RT, Moniz Cook ED, Orrell M, Spector A (2003) Cognitive rehabilitation and cognitive training for early-stage Alzheimer's disease and vascular dementia. *Cochrane Database Syst Rev* 2003: CD003260.
- Jak A, Seelye A, Jurick S (2013) Crosswords to computers: a critical review of popular approaches to cognitive enhancement. *Neuropsychol Rev* 23: 13–26.
- (10 Aug 2013). Commercialising neuroscience: Brain sells. *The Economist*. Available: <http://www.economist.com/news/business/21583260-cognitive-training-may-be-moneyspinner-despite-scientists-doubts-brain-sells>. Accessed 11 November 2014.
- Green CS, Strobach T, Schubert T (2013) On methodological standards in training and transfer experiments. *Psychol Res*. E-pub ahead of print. doi: 10.1007/s00426-013-0535-3
- Valenzuela M, Sachdev P (2009) Can cognitive exercise prevent the onset of dementia? Systematic review of randomized clinical trials with longitudinal follow-up. *Am J Geriatr Psychiatry* 17: 179–187.
- Papp KV, Walsh SJ, Snyder PJ (2009) Immediate and delayed effects of cognitive interventions in healthy elderly: a review of current literature and future directions. *Alzheimers Dement* 5: 50–60.
- Martin M, Clare L, Altgassen AM, Cameron MH, Zehnder F (2011) Cognition-based interventions for healthy older people and people with mild cognitive impairment. *Cochrane Database Syst Rev* 2011: CD006220.

**Figure S7 Moderators of efficacy of CCT for attention.** <sup>a</sup>*Q*-test for between-group heterogeneity, mixed-effects model. <sup>b</sup>Total number of training hours.  
(TIF)

**Figure S8 Moderators of efficacy of CCT for visuospatial skills.** <sup>a</sup>*Q*-test for between-group heterogeneity, mixed-effects model. <sup>b</sup>Total number of training hours.  
(TIF)

**Table S1 Classification of neuropsychological outcomes.**  
(DOCX)

**Table S2 Group data extraction and results of individual studies.**  
(DOCX)

**Table S3 Data provided by primary authors.**  
(DOCX)

**Table S4 Risk of bias within studies.**  
(DOCX)

**Table S5 Results of sensitivity analyses.**  
(DOCX)

**Checklist S1 PRISMA checklist.**  
(DOC)

**Dataset S1 Raw effect size and moderator data for overall (combined) and domain-specific results.**  
(XLSX)

**Protocol S1 Study protocol.**  
(DOCX)

## Acknowledgments

We thank the authors of primary studies for providing data and other critical information, as well as Bridget Dijkmans-Hadley, Rebecca Moss, and Anna Radowiecka for their help with study quality and risk of bias assessments.

## Author Contributions

Conceived and designed the experiments: AL MV. Analyzed the data: AL HH MV. Wrote the first draft of the manuscript: AL. Wrote the paper: AL HH MV. Agree with manuscript results and conclusions, and ICMJE criteria for authorship read and met: AL HH MV.

17. Reijnders J, van Heugten C, van Boxtel M (2013) Cognitive interventions in healthy older adults and people with mild cognitive impairment: a systematic review. *Ageing Res Rev* 12: 263–275.
18. Kelly ME, Loughrey D, Lawlor BA, Robertson IH, Walsh C, et al. (2014) The impact of cognitive training and mental stimulation on cognitive and everyday functioning of healthy older adults: a systematic review and meta-analysis. *Ageing Res Rev* 15: 28–43.
19. Liberati A, Altman DG, Tetzlaff J, Mulrow C, Gotzsche PC, et al. (2009) The PRISMA statement for reporting systematic reviews and meta-analyses of studies that evaluate health care interventions: explanation and elaboration. *PLoS Med* 6: e1000100.
20. Ward A, Arrighi HM, Michels S, Cedarbaum JM (2012) Mild cognitive impairment: disparity of incidence and prevalence estimates. *Alzheimers Dement* 8: 14–21.
21. Strauss EH, Sherman EMS, Spreen OA, editors (2006) A compendium of neuropsychological tests: administration, norms and commentary. Oxford: Oxford University Press.
22. Anguera JA, Boccanfuso J, Rintoul JL, Al-Hashimi O, Faraji F, et al. (2013) Video game training enhances cognitive control in older adults. *Nature* 501: 97–101.
23. Maillot P, Perrot A, Hartley A (2012) Effects of interactive physical-activity video-game training on physical and cognitive function in older adults. *Psychol Aging* 27: 589–600.
24. Nouchi R, Taki Y, Takeuchi H, Hashizume H, Akitsuki Y, et al. (2012) Brain training game improves executive functions and processing speed in the elderly: a randomized controlled trial. *PLoS ONE* 7: e29676.
25. Smith GE, Housen P, Yaffe K, Ruff R, Kennison RF, et al. (2009) A cognitive training program based on principles of brain plasticity: results from the Improvement in Memory with Plasticity-based Adaptive Cognitive Training (IMPACT) study. *J Am Geriatr Soc* 57: 594–603.
26. Bavelier D, Green CS, Han DH, Renshaw PF, Merzenich MM, et al. (2011) Brains on video games. *Nat Rev Neurosci* 12: 763–768.
27. Higgins J, Green S, editors (2011) *Cochrane handbook for systematic reviews of interventions* version 5.1.0. The Cochrane Collaboration.
28. Maher CG, Sherrington C, Herbert RD, Moseley AM, Elkins M (2003) Reliability of the PEDro scale for rating quality of randomized controlled trials. *Phys Ther* 83: 713–721.
29. Wykes T, Huddy V, Cellard C, McGurk SR, Czobor P (2011) A meta-analysis of cognitive remediation for schizophrenia: methodology and effect sizes. *Am J Psychiatry* 168: 472–485.
30. Gleser LJ, Olkin I (2009) Stochastically dependent effect sizes. In: Cooper H, Hedges L, Valentine J, editors. *The handbook of research synthesis and meta-analysis*, 2nd edition. New York: Russell Sage Foundation. pp. 357–376.
31. Borenstein M, Hedges L, Higgins JP, Rothstein HR (2009) *Introduction to meta-analysis*. Chichester: Wiley.
32. Higgins JP, Thompson SG (2002) Quantifying heterogeneity in a meta-analysis. *Stat Med* 21: 1539–1558.
33. Higgins JP, Thompson SG, Deeks JJ, Altman DG (2003) Measuring inconsistency in meta-analyses. *BMJ* 327: 557–560.
34. Borenstein M, Higgins JP (2013) Meta-analysis and subgroups. *Prev Sci* 14: 134–143.
35. Sterne JA, Sutton AJ, Ioannidis JP, Terrin N, Jones DR, et al. (2011) Recommendations for examining and interpreting funnel plot asymmetry in meta-analyses of randomised controlled trials. *BMJ* 343: d4002.
36. Egger M, Davey Smith G, Schneider M, Minder C (1997) Bias in meta-analysis detected by a simple, graphical test. *BMJ* 315: 629–634.
37. McDougall S, House B (2012) Brain training in older adults: evidence of transfer to memory span performance and pseudo-Matthew effects. *Neuropsychol Dev Cogn B Aging Neuropsychol Cogn* 19: 195–221.
38. Schmiedek F, Lovden M, Lindenberger U (2010) Hundred days of cognitive training enhance broad cognitive abilities in adulthood: findings from the COGITO study. *Front Aging Neurosci* 2: 27.
39. Theill N, Schumacher V, Adelsberger R, Martin J, Jancke L (2013) Effects of simultaneously performed cognitive and physical training in older adults. *BMC Neurosci* 14: 103.
40. Gajewski PD, Falkenstein M (2012) Training-induced improvement of response selection and error detection in aging assessed by task switching: effects of cognitive, physical, and relaxation training. *Front Hum Neurosci* 6: 130.
41. Wild-Wall N, Falkenstein M, Gajewski PD (2012) Neural correlates of changes in a visual search task due to cognitive training in seniors. *Neural Plast* 2012: 529057.
42. Barnes DE, Santos-Modesitt W, Poelke G, Kramer AF, Castro C, et al. (2013) The Mental Activity and eXercise (MAX) trial: a randomized controlled trial to enhance cognitive function in older adults. *JAMA Intern Med* 173: 797–804.
43. Colzato LS, van Muijden J, Band GP, Hommel B (2011) Genetic modulation of training and transfer in older adults: BDNF ValMet polymorphism is associated with wider useful field of view. *Front Psychol* 2: 199.
44. Dahlin E, Nyberg L, Backman L, Neely AS (2008) Plasticity of executive functioning in young and older adults: immediate training gains, transfer, and long-term maintenance. *Psychol Aging* 23: 720–730.
45. Dustman RE, Emmerson RY, Steinhaus LA, Shearer DE, Dustman TJ (1992) The effects of videogame playing on neuropsychological performance of elderly individuals. *J Gerontol* 47: P168–P171.
46. Mahncke HW, Connor BB, Appelman J, Ahsanuddin ON, Hardy JL, et al. (2006) Memory enhancement in healthy older adults using a brain plasticity-based training program: a randomized, controlled study. *Proc Natl Acad Sci U S A* 103: 12523–12528.
47. Edwards JD, Wadley VG, Vance DE, Wood K, Roenker DL, et al. (2005) The impact of speed of processing training on cognitive and everyday performance. *Aging Ment Health* 9: 262–271.
48. Goldstein J, Cajko L, Oosterbroek M, Michielsen M, Van Houten O, et al. (1997) Video games and the elderly. *Soc Behav Pers* 25: 345–352.
49. Lampit A, Hallock H, Moss R, Kwok S, Rosser M, et al. (2014) The timecourse of global cognitive gains from supervised computer-assisted cognitive training: a randomised, active-controlled trial in elderly with multiple dementia risk factors. *J Prev Alzheimers Dis* 1: 33–39.
50. Lee Y, Lee C-R, Hwang B (2012) Effects of computer-aided cognitive rehabilitation training and balance exercise on cognitive and visual perception ability of the elderly. *J Phys Ther Sci* 24: 885–887.
51. Vance D, Dawson J, Wadley V, Edwards J, Roenker D, et al. (2007) The accelerate study: the longitudinal effect of speed of processing training on cognitive performance of older adults. *Rehabil Psychol* 52: 89–96.
52. Wolinsky FD, Vander Weg MW, Howren MB, Jones MP, Martin R, et al. (2011) Interim analyses from a randomised controlled trial to improve visual processing speed in older adults: the Iowa Healthy and Active Minds Study. *BMJ Open* 1: e000225.
53. Belchior P, Marsiske M, Sisco SM, Yam A, Bavelier D, et al. (2013) Video game training to improve selective visual attention in older adults. *Comput Human Behav* 29: 1318–1324.
54. Ball K, Berch DB, Helmers KF, Jobe JB, Leveck MD, et al. (2002) Effects of cognitive training interventions with older adults: a randomized controlled trial. *JAMA* 288: 2271–2281.
55. Berry AS, Zanto TP, Clapp WC, Hardy JL, Delahunt PB, et al. (2010) The influence of perceptual training on working memory in older adults. *PLoS ONE* 5: e11537.
56. Botiroli S, Cavallini E (2009) Can computer familiarity regulate the benefits of computer-based memory training in normal aging? A study with an Italian sample of older adults. *Neuropsychol Dev Cogn B Aging Neuropsychol Cogn* 16: 401–418.
57. Garcia-Campuzano MT, Virues-Ortega J, Smith S, Moussavi Z (2013) Effect of cognitive training targeting associative memory in the elderly: a small randomized trial and a longitudinal evaluation. *J Am Geriatr Soc* 61: 2252–2254.
58. Li KZ, Roudaia E, Lussier M, Bherer L, Leroux A, et al. (2010) Benefits of cognitive dual-task training on balance performance in healthy older adults. *J Gerontol A Biol Sci Med Sci* 65: 1344–1352.
59. Lussier M, Gagnon C, Bherer L (2012) An investigation of response and stimulus modality transfer effects after dual-task training in younger and older. *Front Hum Neurosci* 6: 129.
60. Mayas J, Parmentier FBR, Andres P, Ballesteros S (2014) Plasticity of attentional functions in older adults after non-action video game training: a randomized controlled trial. *PLoS ONE* 9: e92269.
61. O'Brien JL, Edwards JD, Maxfield ND, Peronto CL, Williams VA, et al. (2013) Cognitive training and selective attention in the aging brain: an electrophysiological study. *Clin Neurophysiol* 124: 2198–2208.
62. Peng H, Wen J, Wang D, Gao Y (2012) The impact of processing speed training on working memory in old adults. *J Adult Dev* 19: 150–157.
63. van Muijden J, Band GP, Hommel B (2012) Online games training aging brains: limited transfer to cognitive control functions. *Front Hum Neurosci* 6: 221.
64. Ackerman PL, Kanfer R, Calderwood C (2010) Use it or lose it? Wii brain exercise practice and reading for domain knowledge. *Psychol Aging* 25: 753–766.
65. Anderson S, White-Schwoch T, Parbery-Clark A, Kraus N (2013) Reversal of age-related neural timing delays with training. *Proc Natl Acad Sci U S A* 110: 4357–4362.
66. Basak C, Boot WR, Voss MW, Kramer AF (2008) Can training in a real-time strategy video game attenuate cognitive decline in older adults? *Psychol Aging* 23: 765–777.
67. Boot WR, Champion M, Blakely DP, Wright T, Souders DJ, et al. (2013) Video games as a means to reduce age-related cognitive decline: attitudes, compliance, and effectiveness. *Front Psychol* 4: 31.
68. Bozoki A, Radovanovic M, Winn B, Heeter C, Anthony JC (2013) Effects of a computer-based cognitive exercise program on age-related cognitive decline. *Arch Gerontol Geriatr* 57: 1–7.
69. Edwards JD, Wadley VG, Myers RS, Roenker DL, Cissell GM, et al. (2002) Transfer of a speed of processing intervention to near and far cognitive functions. *Gerontology* 48: 329–340.
70. Edwards JD, Valdes EG, Peronto C, Castora-Binkley M, Alwerdt J, et al. (2013) The efficacy of InSight cognitive training to improve useful field of view performance: a brief report. *J Gerontol B Psychol Sci Soc Sci*. E-pub ahead of print. doi:10.1093/geronb/gbt113
71. Legault C, Jennings JM, Katula JA, Dagenbach D, Gaussoin SA, et al. (2011) Designing clinical trials for assessing the effects of cognitive training and physical activity interventions on cognitive outcomes: the Seniors Health and Activity Research Program Pilot (SHARP-P) study, a randomized controlled trial. *BMC Geriatr* 11: 27.



72. Miller KJ, Dye RV, Kim J, Jennings JL, O'Toole E, et al. (2013) Effect of a computerized brain exercise program on cognitive performance in older adults. *Am J Geriatr Psychiatry* 21: 655–663.
73. Rasmusson DX, Rebok GW, Bylsma FW, Brandt J (1999) Effects of three types of memory training in normal elderly. *Neuropsychol Dev Cogn B Aging Neuropsychol Cogn* 6: 56–66.
74. Richmond LL, Morrison AB, Chein JM, Olson IR (2011) Working memory training and transfer in older adults. *Psychol Aging* 26: 813–822.
75. Shatil E (2013) Does combined cognitive training and physical activity training enhance cognitive abilities more than either alone? A four-condition randomized controlled trial among healthy older adults. *Front Aging Neurosci* 5: 8.
76. Stern Y, Blumen HM, Rich LW, Richards A, Herzberg G, et al. (2011) Space Fortress game training and executive control in older adults: a pilot intervention. *Neuropsychol Dev Cogn B Aging Neuropsychol Cogn* 18: 653–677.
77. Brehmer Y, Westerberg H, Backman L (2012) Working-memory training in younger and older adults: training gains, transfer, and maintenance. *Front Hum Neurosci* 6: 63.
78. Burki CN, Ludwig C, Chicherio C, de Ribaupierre A (2014) Individual differences in cognitive plasticity: an investigation of training curves in younger and older adults. *Psychol Res*. E-pub ahead of print. doi:10.1007/s00426-014-0559-3
79. Buschkuehl M, Jaeggi SM, Hutchison S, Perrig-Chiello P, Dapp C, et al. (2008) Impact of working memory training on memory performance in old-old adults. *Psychol Aging* 23: 743–753.
80. Casutt G, Theill N, Martin M, Keller M, Jancke L (2014) The drive-wise project: driving simulator training increases real driving performance in healthy older drivers. *Front Aging Neurosci* 6: 85.
81. Heinzl S, Schulte S, Onken J, Duong QL, Riemer TG, et al. (2014) Working memory training improvements and gains in non-trained cognitive tasks in young and older adults. *Neuropsychol Dev Cogn B Aging Neuropsychol Cogn* 21: 146–173.
82. McAvinue LP, Golemmé M, Castorina M, Tatti E, Pigni FM, et al. (2013) An evaluation of a working memory training scheme in older adults. *Front Aging Neurosci* 5: 20.
83. Sandberg P, Ronnlund M, Nyberg L, Stigsdotter Neely A (2014) Executive process training in young and old adults. *Neuropsychol Dev Cogn B Aging Neuropsychol Cogn* 21: 577–605.
84. Shatil E, Mikulecka J, Bellotti F, Bures V (2014) Novel television-based cognitive training improves working memory and executive function. *PLoS ONE* 9: e101472.
85. von Bastian CC, Langer N, Jancke L, Oberauer K (2013) Effects of working memory training in young and old adults. *Mem Cognit* 41: 611–624.
86. Simpson T, Camfield D, Pipingas A, Macpherson H, Stough C (2012) Improved processing speed: online computer-based cognitive training in older adults. *Educ Gerontol* 38: 445–458.
87. Peretz C, Korczyn AD, Shatil E, Aharonson V, Birnboim S, et al. (2011) Computer-based, personalized cognitive training versus classical computer games: a randomized double-blind prospective trial of cognitive stimulation. *Neuroepidemiology* 36: 91–99.
88. Wang MY, Chang CY, Su SY (2011) What's cooking?—cognitive training of executive function in the elderly. *Front Psychol* 2: 228.
89. Colcombe S, Kramer AF (2003) Fitness effects on the cognitive function of older adults: a meta-analytic study. *Psychol Sci* 14: 125–130.
90. Gross AL, Parisi JM, Spira AP, Kucider AM, Ko JY, et al. (2012) Memory training interventions for older adults: a meta-analysis. *Aging Ment Health* 16: 722–734.
91. Melby-Lervåg M, Hulme C (2013) Is working memory training effective? A meta-analytic review. *Dev Psychol* 49: 270–291.
92. Kivipelto M, Solomon A, Ahtiluoto S, Ngandu T, Lehtisalo J, et al. (2013) The Finnish Geriatric Intervention Study to Prevent Cognitive Impairment and Disability (FINGER): study design and progress. *Alzheimers Dement* 9: 657–665.
93. Anstey KJ, Burns RA, Birrell CL, Steel D, Kiely KM, et al. (2010) Estimates of probable dementia prevalence from population-based surveys compared with dementia prevalence estimates based on meta-analyses. *BMC Neurol* 10: 62.
94. Verhaeghen P, Marcoen A, Goossens L (1992) Improving memory performance in the aged through mnemonic training: a meta-analytic study. *Psychol Aging* 7: 242–251.
95. Luscher C, Nicoll RA, Malenka RC, Muller D (2000) Synaptic plasticity and dynamic modulation of the postsynaptic membrane. *Nat Neurosci* 3: 545–550.
96. Holtzer R, Shuman M, Mahoney JR, Lipton R, Verghese J (2011) Cognitive fatigue defined in the context of attention networks. *Neuropsychol Dev Cogn B Aging Neuropsychol Cogn* 18: 108–128.
97. Wang Z, Zhou R, Shah P (2014) Spaced cognitive training promotes training transfer. *Front Hum Neurosci* 8: 217.
98. Penner IK, Vogt A, Sticklin M, Gschwind L, Opwis K, et al. (2012) Computerised working memory training in healthy adults: a comparison of two different training schedules. *Neuropsychol Rehabil* 22: 716–733.
99. Gates NJ, Sachdev PS, Fiatarone Singh MA, Valenzuela M (2011) Cognitive and memory training in adults at risk of dementia: a systematic review. *BMC Geriatr* 11: 55.
100. Bahar-Fuchs A, Clare L, Woods B (2013) Cognitive training and cognitive rehabilitation for mild to moderate Alzheimer's disease and vascular dementia. *Cochrane Database Syst Rev* 6: CD003260.
101. Jaeggi SM, Buschkuehl M, Jonides J, Shah P (2011) Short- and long-term benefits of cognitive training. *Proc Natl Acad Sci U S A* 108: 10081–10086.

## Editors' Summary

**Background.** As we get older, we notice many bodily changes. Our hair goes grey, we develop new aches and pains, and getting out of bed in the morning takes longer than it did when we were young. Our brain may also show signs of aging. It may take us longer to learn new information, we may lose our keys more frequently, and we may forget people's names. Cognitive decline—developing worsened thinking, language, memory, understanding, and judgment—can be a normal part of aging, but it can also be an early sign of dementia, a group of brain disorders characterized by a severe, irreversible decline in cognitive functions. We know that age-related physical decline can be attenuated by keeping physically active; similarly, engaging in activities that stimulate the brain throughout life is thought to enhance cognition in later life and reduce the risk of age-related cognitive decline and dementia. Thus, having an active social life and doing challenging activities that stimulate both the brain and the body may help to stave off cognitive decline.

**Why Was This Study Done?** “Brain training” may be another way of keeping mentally fit. The sale of computerized cognitive training (CCT) packages, which provide standardized, cognitively challenging tasks designed to “exercise” various cognitive functions, is a lucrative and expanding business. But does CCT work? Given the rising global incidence of dementia, effective interventions that attenuate age-related cognitive decline are urgently needed. However, the impact of CCT on cognitive performance in older adults is unclear, and little is known about what makes a good CCT package. In this systematic review and meta-analysis, the researchers assess whether CCT programs improve cognitive test performance in cognitively healthy older adults and identify the aspects of cognition (cognitive domains) that are responsive to CCT, and the CCT design features that are most important in improving cognitive performance. A systematic review uses pre-defined criteria to identify all the research on a given topic; meta-analysis uses statistical methods to combine the results of several studies.

**What Did the Researchers Do and Find?** The researchers identified 51 trials that investigated the effects of more than four hours of CCT on nearly 5,000 cognitively healthy older adults by measuring several cognitive functions before and after CCT. Meta-analysis of these studies indicated that the overall effect size for CCT (compared to control individuals who did not participate in CCT) was small but statistically significant. An effect size quantifies the difference between two groups; a statistically significant result is a result that is unlikely to have occurred by chance. So, the meta-analysis suggests that CCT slightly increased overall cognitive function. Notably, CCT also had small to moderate significant effects on individual cognitive functions. For example, some CCT slightly improved nonverbal memory (the ability to remember visual images) and working memory (the ability to

remember recent events; short-term memory). However, CCT had no significant effect on executive functions (cognitive processes involved in planning and judgment) or attention (selective concentration on one aspect of the environment). The design of CCT used in the different studies varied considerably, and “moderator” analyses revealed that home-based CCT was not effective, whereas center-based CCT was effective, and that training sessions undertaken more than three times a week were not effective. There was also some weak evidence suggesting that CCT sessions lasting less than 30 minutes may be ineffective. Finally, there was no evidence for the effectiveness of working memory training by itself (for example, programs that ask individuals to recall series of letters).

**What Do These Findings Mean?** These findings suggest that CCT produces small improvements in cognitive performance in cognitively healthy older adults but that the efficacy of CCT varies across cognitive domains and is largely determined by design aspects of CCT. The most important result was that “do-it-yourself” CCT at home did not produce improvements. Rather, the small improvements seen were in individuals supervised by a trainer in a center and undergoing sessions 1–3 times a week. Because only cognitively healthy older adults were enrolled in the studies considered in this systematic review and meta-analysis, these findings do not necessarily apply to cognitively impaired individuals. Moreover, because all the included studies measured cognitive function immediately after CCT, these findings provide no information about the durability of the effects of CCT or about how the effects of CCT on cognitive function translate into real-life outcomes for individuals such as independence and the long-term risk of dementia. The researchers call, therefore, for additional research into CCT, an intervention that might help to attenuate age-related cognitive decline and improve the quality of life for older individuals.

**Additional Information.** Please access these websites via the online version of this summary at <http://dx.doi.org/10.1371/journal.pmed.1001756>.

- This study is further discussed in a *PLOS Medicine* Perspective by Druin Burch
- The US National Institute on Aging provides information for patients and carers about age-related forgetfulness, about memory and cognitive health, and about dementia (in English and Spanish)
- The UK National Health Service Choices website also provides information about dementia and about memory loss
- MedlinePlus provides links to additional resources about memory, mild cognitive impairment, and dementia (in English and Spanish)
